# Supplementary material for: Towards an automated classification phase in the software maintenance process using decision tree
Source: PeerJ journal article supplement (doi:10.7717/peerj-cs.2228), 2024-08-30
Supplement: Dataset.xlsx [file Dataset.xlsx]

## Sheet: Sheet1
Number	Comment	Sort	A/R	Rank
1	Make it like better with a giant pig bigger than king pig.	P	R	Class4
2	These screens are small enough without crowding in more stuff" Tuck it in with the rest of the add ons I never use and please get it out of my face!"	P	R	Class4
3	App crashes when new power up notice pops up.	C	A	Class1
4	App crashes with new release.	C	A	Class1
5	Please bring back the trajectory line or at least make it to where you can turn it on or off.	P	R	Class4
6	This is not worth buying it will crash right from the beginning.	C	R	Class1
7	This should Really be fixed!	C	R	Class4
8	Is it just me, or is anyone else having the problem where the app won t even open at all?	C	A	Class1
9	I need to save my photos.	A	A	Class2
10	The app doesn t work unless you have the iOS 7 update and not all devices have that update so they should really fix this.	C	R	Class1
11	Please, please give us the ability to rename files from this app.	A	A	Class3
12	Sez needs software update but Apple sez software is uptodate.	C	R	Class1
13	Please, please FIX this video upload issue.	C	A	Class2
14	Please fix the syncing issues with the iPad app.	P	A	Class1
15	U Dropbox employers improved mostly everything, but in the app it should have the ability to rename files, whereas the web version can.	A	R	Class3
16	Ask me if I would like to use background uploading only once and remember my preference don t pester me every time I open the app to turn that feature on.	A	A	Class4
17	I ve been a loyal EN fan for years but just this week it s frozen and after reinstalling on both my iPad and iPhone, it crashes each time I open it.	C	A	Class1
18	For some reason, it doesn t quite feel user friendly to me just yet.	P	A	Class2
19	Latest version crashes on launch on my iPad in iOS 7.	C	R	Class1
20	It crashes all the time and the only way I can resolve is uninstall/reinstall the app.	C	A	Class1
21	The new version crashes on startup on my iPhone and iPad.	C	R	Class1
22	Deleting app and reinstalling does not work either.	C	A	Class1
23	The latest version crashes on launch for my iPhone 5s.	C	R	Class1
24	This is the third update in 3 months that has crashed upon installation for me.	C	R	Class1
25	Just crashes.	C	R	Class4
26	Now, it crashes when loading.	C	A	Class1
27	The latest interface is substandard from a useability standpoint besides being ugly, and the latest version will not launch on my iPhone 5.	P	A	Class2
28	Latest update crashes every time on startup on 5S.	C	A	Class1
29	I count on Evernote for many things across many devices but now the app just crashes on my iPhone 5.	C	R	Class1
30	Latest update crashes!	C	R	Class4
31	Just crashes shortly upon launch.	C	R	Class4
32	Since IOS 7,2, it continues to crash upon opening.	C	A	Class1
33	Don t upgrade, newest version has a connectivity problem with wifi and won t open.	C	A	Class1
34	Even after clean install this app crashes over and over ;(\nGuys, please test updates before releasing them.	C	A	Class1
35	They made it so complicated n difficult to use (it was a lot more easier few updates ago), I have no idea how to add a note.	P	A	Class2
36	It won t remain open for more than 10 seconds before it crashes.	C	R	Class1
37	\n\nDeletion and reinstallation of the app has yet to resolve the issue.	C	R	Class1
38	App keeps freezing and then it crashes.	C	R	Class1
39	Very disappointed I can t access my info as premium user.	C	A	Class2
40	The newest update crashes repeatedly!	C	A	Class1
41	Now I can t access any of my notes.	C	A	Class2
42	After the latest upgrades, there were issues and now it crashes and I cannot access anything.	C	A	Class1
43	I have tried to delete and reinstall but that didn t fix the problem.	C	R	Class1
44	New version crashes every time on iPhone 5.	C	R	Class1
45	\nThe biggest problem for the new version is people like me having 30 notebooks and 80 tags have big trouble switching between notes.	P	A	Class3
46	You have to tap several times between each switch.	P	A	Class2
47	\n\nThe second problem is the ugly interface, probably for matching the ugly icons of iOS 7?	P	A	Class2
48	It crashes.	C	R	Class4
49	'Unable to sync' this is a past problem.	P	R	Class1
50	Recent update causes Evernote on iOS to fail.	C	A	Class1
51	Whit screen of death...can t even use ,	C	A	Class1
52	Update crashes all the time.	C	A	Class1
53	Once again Evernote has launched an update that crashes on both my iPad and iPhone 5S.	C	R	Class1
54	The last update crashes upon opening on iPad and iPhone!	C	R	Class1
55	It tries to open for a few seconds then crashes to home screen.	C	R	Class1
56	I tried uninstalling rebooting reinstall but the same result occurs.	C	R	Class1
57	Please fix this ASAP!	C	R	Class4
58	New version crashes on both iPad 2 and iPhone 4S.	C	A	Class1
59	Please fix app.	C	R	Class4
60	I love Evernote and have become very reliant on it, one of the apps I can t do without however I am without it now because it crashes on open and will not open on iPhone.	C	R	Class1
61	Tried to delete and reinstall but it still crashes.	C	R	Class1
62	Sclathos , Evernote is not working after upgrade.	C	A	Class1
63	It will open but then it crashes and sometimes re opens on its own.	C	A	Class1
64	You can t open any notes when it does load.	C	A	Class2
65	When I try to take a photo as a note, the app crashes.	C	A	Class1
66	7.2 completely crashes on startup on iphone 5 and ipad 3.	C	A	Class1
67	App crashes on update, even after reboot and reinstall.	C	R	Class1
68	One of my all time favorite apps, however the latest update makes it unable as it freezes and crashes.	C	R	Class1
69	It s a great program, but since the last update last night, it just crashes every time I open it.	C	R	Class1
70	\n\nI uninstalled it, reinstalled it, still crashes.	C	R	Class1
71	I uninstalled it, did a clean boot, installed again, still crashes, Evernote, please fix this ASAP.	C	R	Class1
72	Only complaint is you can t change then orientation, which is especially bothersome for videos.	A	A	Class2
73	It would be nice if it would let you start typing the name of the board and it would pull it up.	A	A	Class4
74	The only issue is that the search function for your own pins is not very accurate.	C	A	Class4
75	Its good but it can use a bit of an improvement, like sometimes the pictures just doesnt show and it takes a while for it to get back but that would be it ,	P	A	Class1
76	I wish there was a way to put my boards in alphabetical order without moving them all individually.	A	A	Class3
77	The app on my iPad regularly crashes.	C	R	Class1
78	I can be bombarded with ads anywhere I don t need to sit and browse through them.	C	A	Class4
79	However, it has crashed a couple of times recently on the iPad.	C	R	Class4
80	\n Absolutely HATE the new way they list the categories with a picture....please go back to the old list...or let us choose which we d like to use.	P	A	Class4
81	I think it s much easier to pin things on the app than it is to pin them on the website.	P	A	Class4
82	Frequent app crashes on my iPad, please fix this bug!	C	R	Class1
83	\n\n~update for new version~\n\nI preferred the last layout and it STILL crashes when the orientation changes (and at random, too).	C	A	Class1
84	Please fix the bugs!!	C	R	Class4
85	Does the job you need it for but occasional crashes (I use it daily and it probably crashes once a week) can be a nuisance, but just briefly.	C	R	Class4
86	Will,lock up,and crash often.	C	R	Class4
87	Sha chey Renee , This new update crashes when I click on images	C	A	Class1
88	and I can t see my followers and who s following me please change this ,	C	A	Class2
89	I would have given it 5 stars except it crashes for no reason &amp; whatever you were looking at is lost.	C	R	Class1
90	Please fix this soon!!	C	R	Class4
91	I want to change the covers on my boards, but you can t do that in this update, please fix it or if you got rid of it, please bring it back!	C	A	Class3
92	However, in the last update something happened and now the app crashes constantly and when I can get in, all my pictures are gone.	C	A	Class1
93	Please fix this soon!!	C	R	Class4
94	The only thing is it crashes a lot!	C	R	Class1
95	I find it very annoying that Pinterest keeps crashing literally every few minutes...didn t have this problem before.	C	R	Class1
96	It will work fine sometimes, but since the new update if I leave and come back to the app the images won t show up.	C	A	Class2
97	I ve seen many people have this issue, and currently mine takes up 1.5 gb of my memory because it saves every single photo u pin or look at in the cache.	P	A	Class1
98	Very annoyed that I can t delete pins from notifications tab.	C	A	Class3
99	\n I would like to suggest the idea that Pinterest create folders for our boards.	A	A	Class3
100	Now I have to scroll through all of them instead of just touching a letter to find the board.	P	A	Class1
101	Please undo this terrible update!!!!	C	R	Class4
102	While aesthetically better looking, it does not work well.	C	R	Class4
103	The new updates are causing problems...first it was crashing my iPad almost every day.	C	R	Class1
104	Now, it won t load correctly (pictures missing) and my boards are missing cover pics, which I can t even edit because there s no option to change the picture anymore.	C	A	Class3
105	Bdmama13 , I love the app but I can t pin from etsy or other websites with the Pinterest button on the iPad mini.	C	A	Class3
106	Wouldn t let me update the app.	C	A	Class2
107	Since update can t login with my Fb acct!	C	A	Class1
108	I want to know if anybody is having the problem about an update on Pinterest!	C	R	Class4
109	When I try to update it says that the app is no longer available.	C	A	Class2
110	I cant get the app it says its no longer available ,	C	A	Class2
111	Trying to update and keeps saying the item I m trying to purchase is not available.	C	A	Class2
112	Um I m not trying to purchase I m trying to update please fix ASAP now it s saying can t connect to iTunes I m getting frustrated ,	C	A	Class2
113	I uninstalled it because when I tried to update it said What you ve tried to buy is no longer available.""	C	R	Class2
114	I was trying to update my phone but it s telling me that Pinterest is no longer available.	C	R	Class2
115	When the update came I tried to update it but it said that It wouldn t let me.	C	R	Class2
116	Tried to update this app (the update is for bug fixes) and it tells me the item I m trying to buy is no longer available!!!	C	R	Class2
117	For some reason it s not letting me update &amp; 'this update is no longer available' and then it deleted my app	C	A	Class1
118	So, I tried uninstalling and reinstalling it, but now it won t let me download the app.	C	R	Class1
119	It says 'The item you tried to buy is no longer available.'	C	A	Class2
120	magirlokmynameisnicky , It won t let me create an account at all I think it is a bug or something.	C	A	Class1
121	Of course I adore Pinterest but the app always has bugs and the last update has made Pinterest completely unusable.	C	A	Class1
122	I can t even open the app after it s latest update!	C	A	Class1
123	The only thing wrong is when I go to repin something, I go to write a description and click on the box but it crashes.	C	A	Class1
124	I cannot access my notifications anymore and when I try to change captions I can t. Why can t I post comments anymore?!?!?!?!	C	A	Class3
125	I love love Pintrest but hate that it sometimes crashes since iOS 7 has come out never had that problem before but for that issue a great app.	C	R	Class4
126	Other than after I updated it it crashes every other time I use it!	C	R	Class4
127	The app shuts down,	C	A	Class1
128	won t load some pins,	C	A	Class3
129	and I can t edit pins.	C	A	Class3
130	It was perfect before I updated it 2 minutes ago.	C	R	Class1
131	Can t view pins, all notifications have disappeared, crashes constantly.	C	A	Class3
132	\nWish i could have more than 3 secret boards, please add the feature.	A	A	Class4
133	Please fix this bug problem Thank you.	C	R	Class4
134	Please find a way to sort the DIY and Etsy stuff apart from each other it s frustrating to click on a project only to find you ve been diverted to an Etsy store.	A	A	Class4
135	Sometime I can t click to go to websites but overall good app.	C	A	Class4
136	I still feel all these larger companies should have the email synch up with my app so when I get an alert and click on the email it should go to my app not the web page.	P	A	Class2
137	However it constantly crashes and freezes!!!!!	C	R	Class1
138	Love using the app but very very annoying they need to fix all the glitches !!!!!	C	R	Class1
139	\nMy only qualm is not being able to easily save pictures.	P	A	Class2
140	Great site, need to improve stability.	P	A	Class1
141	I almost never have any issues with it except sometimes the notifications won t refresh or sometimes the notifications take days to show up ,	C	A	Class2
142	Ever since the iOS 7 update, the app crashes whenever I try to look at my notifications.	C	A	Class1
143	I love the app but it crashes only 5 minuets into searching and looking on it.	C	R	Class4
144	Love Pinterest but the app crashes from time to time.	C	R	Class4
145	Love Pinterest but will just crash when I try too look at pin notices.	C	A	Class1
146	Only problems I have are there is no multiple upload option.	A	A	Class2
147	Would be nice to easily move pins if pinned mistakingly to wrong bored.	P	A	Class3
148	Brynnmlj , Every time I open my feed, it crashes same with my profile!	C	A	Class1
149	They need to make some fixes.	C	R	Class4
150	Notifications are broken and can t access sent pins.	C	A	Class2
151	I don t like how you have to comment on them now, how i have to scroll through all my boards to get to one and I really hate how you cant have more than one board open at a time with the x s in the corner.	P	A	Class2
152	The only thing I hate is the bug that shut it s down, usually when I inadvertently have too many windows open.	C	A	Class4
153	Sure would be nice if the app didn t crash so often while I m pinning or just freezes.	C	R	Class4
154	Which one gets you to the list of categories: the home, magnifying glass, plus sign, or person?	P	R	Class4
155	Now it will not load new pins from people I follow	C	A	Class3
156	And if I click to view people I follow then it crashes and closes the app.	C	A	Class1
157	Love this app but it crashes too much!!	C	R	Class1
158	A pretty good representation of the website but took a while to figure out how to save a photo to the camera roll.	P	A	Class3
159	The app still crashes a lot and will often lose the page I was on if I switch to another app for a moment which is really annoying.	C	R	Class4
160	Not a fan of the new layout, and the app still crashes, even on the most recent iOS platform.	C	A	Class1
161	I receive a lot of pins and its frustrating that the pins show up small I think it would be cool if it comes up like the pins do when we are pinning.	P	A	Class2
162	Having the pins on the left needs to be moved back to the middle.	A	A	Class4
163	Only thing I wish it would do would allow me to print from my iPad easily.	A	A	Class2
164	The only complaint I have is that it crashes at random times.	C	A	Class1
165	Very well put together but after using for a little bit on my iPhone, the app crashes.	C	R	Class1
166	When using it on my iPad it crashes and my iPad just shuts off then restarts it s self.	C	R	Class1
167	Please fix the bugs!	C	R	Class4
168	I LOVE the update, but I can t enjoy it because it still crashes A LOT!	C	R	Class1
169	This app crashes at least twice a day and now is not fully loading the activity my pins are getting.	C	A	Class1
170	I don t like the pull up menu, please fix!!	C	A	Class4
171	I hate that you can no longer see all the other items people pinned when you click on a specific pin.	A	A	Class3
172	Please fix it.	C	R	Class4
173	All my past notifications are gone (I liked being able to look through the past ones) and I can t access related pins, which was really helpful in narrowing down my search results.	C	A	Class3
174	Please fix bigs.	C	R	Class4
175	I can barely go on there for a minute with out it crashing ,	C	R	Class4
176	If you have numerous boards you now have to click to make the keyboard go away if you change the caption or you can t scroll to the bottom of your board list because the keyboard blocks it.	C	A	Class3
177	Please fix it.	C	R	Class4
178	I hate the new layout, the menu bar at the bottom, the way I can t just tap outside of a box to close it, how the close x" has switched sides with the "pin it" button."	P	A	Class2
179	I use Pinterest a lot, and version 3.3 still has the same issue as the last couple of updates.	C	R	Class4
180	Crashes constantly and will occasionally crash my iPad 3.	C	A	Class1
181	It needs to be fixed not have useless things added on like a map option.	C	A	Class2
182	Obviously Pinterest is having spam issues.	C	A	Class2
183	Every since I updated to iOS7, this app crashes my whole iPad.	C	A	Class1
184	Please fix because I don t like using Pinterest on a browser.	C	R	Class4
185	However, you guys forgot to add the follow count for individual boards.	A	A	Class2
186	It crashes about five times a day, when it IS working it is awesome.	C	R	Class1
187	Totally counterintuitive and just makes things really difficult.	P	A	Class1
188	It is not user friendly to navigate,	P	A	Class1
189	and there is an issue where I can t pin something because the pin button is out of reach.	C	A	Class3
190	Now I can t email pins	C	A	Class3
191	upgrade is sluggish.	P	A	Class1
192	And please add tags bc the search feature becomes useless when my description just says cute or adorable and I have to search my entire board to find something.	A	A	Class3
193	About half of attempted re pins fail, the hide &amp; seek bottom dock is a real pain to use, and it much, much harder to navigate in general than the older version.	C	A	Class3
194	They just need to update the layout I fill like everything is hidden I want a better task bar.	P	A	Class4
195	This version has crashed many more times than previous ones.	C	R	Class1
196	boards/subjects should have some type of restrictions or distinguishing key phrases.	A	A	Class3
197	App is crashing when trying to send a direct message via email.	C	A	Class1
198	Love the app but when I open the notifications it crashes.	C	A	Class1
199	Just please fix this bug.	C	R	Class4
200	I updated my iPhone app and now when I open the app all the pages are blank.	C	A	Class1
201	BSRA1028 , I love this app but ever since I updated it it does not work.	C	R	Class1
202	Please fix this very annoying and limits my use of the site.	C	R	Class1
203	I updated the app and now no pins will show in the news feed or in the categories.	C	A	Class3
204	Please restore a way to open pin links in external browser or let us save photos.	A	A	Class2
205	I just wish that you could have more secret boards.	A	A	Class4
206	Any app that crashes is terrible.	C	R	Class4
207	Pinterest crashes your iPad to the boot screen.	C	A	Class1
208	I love this app but I would also love if they added a way you can see pins people sent you &amp; pins you sent to other people!	A	A	Class1
209	The app crashes my iPad since iOS 7 update.	C	R	Class1
210	Please bring back the save to camera roll.	A	A	Class1
211	Prior to newest update: Love app, only problem is sometimes when I want to pin, it won t let me click pin.	C	A	Class3
212	BUT...every time I go to a website from a pin then come back, it crashes!!!	C	A	Class1
213	Can t email cause it crashes every time.	C	A	Class1
214	Still crashes since updated my iPad 3 with IOS 7.	C	R	Class1
215	I am unable to post a comment...the message I get is: 'You have exceeded your rate.'	C	A	Class3
216	I love this app but now I can t open the pages and I can only see the pins but when I click on them I can t go to the websites.	C	A	Class3
217	I just wish it would allow your to scroll through the home page with one column rather than 2 on the iPhone.	A	A	Class3
218	I do not like how some pins lead you to a dead site, those should be removed.	C	A	Class3
219	Makes it difficult to find things, since I have to try and remember WHEN I created the board, to make it easier to find.	P	A	Class2
220	I ve also had issues with some pins not being clickable.	C	A	Class3
221	I love the app but it crashes every minute and never saves the thing I was about to pin!	C	A	Class1
222	The iPad version has several problems, including stacking open windows in the background, not alphabetizing new categories on your page, and frequent unexpected program crashes.	C	A	Class2
223	but since upgrading to iOS 7, the app frequently crashes.	C	R	Class1
224	Please fix the stability!!	P	A	Class1
225	The latest revision of the app has had some stability problems.	P	R	Class1
226	But, the new update keeps crashing the app every time I try to open a pin.	C	R	Class1
227	The only issue I have is that some of the pins have no link...you click the picture and that s all you get is the photo.	C	A	Class4
228	Also, how in the world do you communicate with someone or send them a pin?	P	R	Class4
229	Excellent app, though it occasionally crashes when browsing through it.	C	A	Class1
230	Push notifications are not working on my iphone although it s set up properly and when you open a sent pin while in email on the iPad, it forces Safari to open, it does not open it in the App.	C	A	Class2
231	Great app but newest update crashes often when pinning on my iPad.	C	R	Class1
232	It appears all bugs have been fixed, but are not.	C	R	Class4
233	s Next Partner :) , ...except the fact that whenever I m in the middle of reading an extra long pin, it crashes!	C	A	Class1
234	Sometimes, if I ve just been on it for a while it crashes.	C	R	Class4
235	Love Pinterest but there has been a lot if crashing since the last update.	C	R	Class1
236	It would be nice if one could rearrange boards on page to have categories that are similar be next to each other, or just to be able to arrange the boards on page to ones liking.	A	A	Class4
237	Please fix this!	C	R	Class4
238	I love Pinterest but I can t open it anymore without it crashing.	C	A	Class1
239	However one frustrating development is when I m deeper into links (say I follow a pin to its site, click on another link and want to pin from there) the app consistently crashes.	C	A	Class1
240	It would be cool to see some type of messaging system integrated where you could suggest a pin to a friend or be alerted if one of your friends commented on something you pinned.	A	A	Class1
241	I liked the previous version of the app, but now there are way to many advertisements that pop up when I am pinning.	C	R	Class4
242	The only issue is that every once in a while, it kicks me out of the app.	C	A	Class1
243	No complaints whatsoever except that the app crashes from time to time on my ipad air.	C	R	Class1
244	Ever since the last update it crashes constantly and makes it very frustrating to use!	C	R	Class1
245	Ever since the latest update my iPad app crashes several times a session when clicking on specific pins.	C	A	Class1
246	However I wish there was an way to alphabetize my boards!	A	R	Class3
247	I greatly enjoy Pinterest, the only problem I find with it is that I can t go back to the same place I was once I click on something, while on my windows phone ,	C	A	Class4
248	Now I can t open links in safari and when I look at other people s boards hardly any of their boards and pins load (you can tell by their pin count).	C	A	Class4
249	My only complaints would be that sometimes it unexpectedly crashes, which sometimes makes me lose great pins.	C	A	Class1
250	But the new update causes crashes everytime I try to open notifications ?	C	R	Class1
251	There are a few issues I ve experienced with uploading certain pictures and being able for others to view.	P	A	Class1
252	However, it is crashing and shutting down the device so it must reboot.	C	R	Class1
253	The update crashes my iPad when I try to open a pin..but other than that I am totally obsessed with it and love all the ideas I get from it ,	C	A	Class1
254	Why does the app always crash when I try to send a pin from my iPad?	C	A	Class1
255	But I wish you could move more than one pin at a time to a new board.	A	A	Class4
256	Now it is so frustrating.....crashes constantly on my iPad.	C	R	Class4
257	I am addicted to pinterest but when I updated it,I can t open the app or even on safari!!	C	R	Class3
258	It crashes every time I close a pin I was looking at.	C	A	Class1
259	Have to copy link and open in a browser, otherwise I just get a grey screen.	C	A	Class2
260	Ever since the update, when the screen orientation is changed, the app crashes and the iPad goes right along with it.	C	A	Class1
261	It repeatedly crashes and resets.	C	R	Class1
262	I wish you were able to create sub boards.	A	A	Class3
263	My entire iPad crashes when I m using Pinterest since the update.	C	R	Class1
264	I also have a problem with it crashing.	C	R	Class4
265	I am addicted to Pinterest, but it is always crashing.	C	A	Class1
266	Sometimes I am unable to see my pins/likes/boards but it s coming along.	C	A	Class3
267	I love this app but it crashes my whole iPad and it has to restart itself.	C	R	Class1
268	I have to manually close pages under the one I am looking at or the program will crash after just a few clicks.	C	A	Class1
269	Application crashes after trying to open link up.	C	A	Class1
270	I can t pin fast enough.	P	A	Class1
271	Can t open pins!!	C	A	Class3
272	The only bad thing is that it crashes quite a bit.	C	R	Class4
273	The app crashes entirely too much.	C	R	Class1
274	App constantly crashes.	C	R	Class1
275	If you try to send a pin to someone, pin something, viewed one of your boards app will either just crash or you get blue screen and ipad restarts itself.	C	A	Class2
276	My app has continually been crashing.	C	R	Class1
277	Can t rename files	C	A	Class4
278	has been difficult to open pins at times.	P	R	Class3
279	The one thing that is missing &amp; something I d like to see is red light notifications like the website version has.	A	A	Class1
280	With the new iOS and app update, I can t open ANY of my pins, or any of the links in safari through the app.	C	A	Class3
281	I am so disappointed with the Pinterest IPad App at how it continues to crash when attempting to open the pinned links.	C	R	Class1
282	Can t open pictures to view larger and on the rare when I can, I can t open the URL.	C	A	Class3
283	I have had op problems with this app.	C	R	Class4
284	NICE Please fix the Whatsapp..all my contact profile picture cannot see.	C	A	Class3
285	Earlier it was running awesome but since d last update its running very slowly, plz resolve d prob!!!	P	A	Class1
286	How abt u give the android users the same functionality?	A	R	Class4
287	Crashes App crashes frequently on HTC phone.	C	A	Class1
288	Installation problem I am not able to install whatsapp on lenovo A269I	P	A	Class1
289	Four stars Its a wonderful app and provides a good way to stay in contact with peepz but its needs more improvement especially in de area of speed	P	A	Class1
290	New Flags added does nt work.plz update.	C	A	Class2
291	Please make an Update of LAST SEEN FREEZE or HIDE LAST SEEN options.	A	A	Class2
292	Media sharing Its good but can be better and if mb in media sharing can incresed then it will be excenlt so please improve it so that I can give it 5 stars	P	A	Class3
293	It should have a built in protection system.	P	A	Class1
294	Cool app Please make sure that we can delete media received from memory and not just from chat.	P	A	Class1
295	They have to fix the update feature properly so that it done at a one go and possibly twice for it to activate previous whatapps conversation account.	C	A	Class3
296	S4 Please we need a Zimbabwean flag	A	A	Class2
297	Using too much memory Whatsapp is using too much memory You have to do something whatsapp team for users having low memory	P	A	Class1
298	I cant download image and videos sent when i try to download image or videos, it says "download was unable to complete, please try again later".	C	A	Class3
299	i have tried to uninstall, the problem is still the same.	C	A	Class3
300	Some defect Please correct this defect when will listen to a voice note than the screen becomes whole black and we are not able to clearly hear the voice in my s4	C	A	Class2
301	Whats up is fail to download...is there any solution?	C	R	Class4
302	It crashes at opening every time!!	C	A	Class1
303	Most of them don t even know how to use spell check on their phone for heavens sake!	P	A	Class4
304	All I get is waiting" then failed to update."	C	A	Class1
305	I went in to print out my schedule request form, so I clicked the print" icon but it crashed on every attempt."	C	A	Class3
306	Menu disappears	C	A	Class3
307	Can t rename files	C	R	Class4
308	Moving files sometime fails and without a cited reason.	C	A	Class3
309	Second, why not use background update feature of ios7 to do it, rather than the awkward location based method?	A	A	Class2
310	It wont even let me change tabs, then crashes.	C	A	Class2
311	Ledmetallicadc , After updating, it logged me out and every time I try to log in, it crashes immediately.	C	A	Class1
312	Ever since iOS 7 update, Dropbox has not worked; constantly crashes,	C	R	Class1
313	when it does run it is EXTREMELY slow, and there are problems with camera uploading.	P	A	Class1
314	Movies should be separated out from videos, just like in the Photos app.	A	R	Class4
315	Why I can t I upload photos from my camera roll one at a time instead of the entire camera roll?	P	A	Class2
316	I even set up a different box to try and fix it thinking my original box was the problem.	C	R	Class4
317	I can t do anything.	C	R	Class4
318	Why no backward compatibility to iOS 6?	P	A	Class1
319	This app needs to support older OS versions!	P	A	Class1
320	I was about ready to leave Evernote because it would often crash and lose my thoughts, also the skeumorphic design was painful to look at.	C	A	Class1
321	The update downloads, but the the nook says it can t open the download.	C	R	Class4
322	It was a wonderful app before and now it almost takes a manual to figure out how to use it.	P	A	Class1
323	It crashes less often, but still does so.	C	R	Class1
324	\n\nSecond, it needs a way to export multiple notes at once to Word so that notes can be edited and compiled into articles and papers for publishing.	A	A	Class1
325	It crashes occasionally,	C	R	Class1
326	and the text formatting is bad.	C	A	Class4
327	Latest update crashes constantly.	C	A	Class1
328	The app seemingly does not support cut and paste after IOS7 upgrade.	C	A	Class3
329	Ever since EverNote 'upgraded' to iOS7 style, it has been a poorly designed bloated app that constantly crashes.	P	A	Class1
330	Every time I re download the app, I then need to wait until it downloads my all my offline notebooks.	P	A	Class1
331	You can t search within a specific notebook without typing in code (very time consuming even IF you can figure out how to do it).	A	A	Class1
332	The list of search results should show the line of the found text, so you can see quickly if that s what you re looking for without having to open it.	A	A	Class1
333	\n\nWish I could create tables since I use this mostly to trap info for reference.	A	A	Class4
334	As of Dec upgrade it still crashes.	C	R	Class1
335	I tried opening it from the App Store but it wouldn t let me.	C	A	Class1
336	Also wish there was a way to view all notes in Flipboard and to display alerts for random notes!	A	A	Class2
337	When I update a note on my PC it takes forever to show up after I sync on phone, sometimes I even have to log out and back for it to show up.	P	A	Class1
338	It crashes every time within 2 minutes of using it.	C	R	Class1
339	Please make it stable, and if possible, bring back the old UI.	P	A	Class1
340	It would be nice to have a word counter feature though ,	A	A	Class3
341	I currently cannot attach photos without it crashing, so I may have to find a replacement soon.	C	A	Class1
342	Just installed it on a new iPad; I m glad I don t have too much invested in it, because I m abandoning it over the font size issue.	P	R	Class4
343	The font is smaller than that of any other app I use, and there is NO way to control it, short of using Evernote through a web browser which entirely defeats the purpose.	P	A	Class4
344	Since the new update the app crashes a lot on my 4s especially when I try to take a photo in the app.	C	R	Class1
345	Start crashing : ( ,	C	R	Class4
346	But since IOS7, it crashes and freezes on a website at least once a week.	C	R	Class1
347	It constantly reports failure to synch, it freezes momentarily between all actions, it crashes here and thee, and the search function sometimes fails to find key words.	P	A	Class1
348	Note, some of my problems may be related with some incompatibility of iPad2 with iOS7.	P	A	Class1
349	Yodaman70 , Not sure if this is an Evernote or iTunes issues but found this app and two others aren t upgradeable yet 60 other apps no problem.	C	A	Class2
350	Still crashes a lot when capturing and attaching photos to the note.	C	A	Class1
351	And, each time a sync error occurs, the error report transmission fails as well.	P	A	Class1
352	I would use it exclusively if it had spreadsheet editing capabilities.	A	A	Class2
353	\nBut you should be able to rearrange your boards on here.	A	A	Class3
354	I recommend some improvements, such as being able to rearrange pins and boards on the app.	A	A	Class3
355	The app used to have major freezing problems.	C	R	Class1
356	\nIt still needs improvements at the functionality level, such as allowing a bigger number of secret boards, more flexibility in the search of pins, pinners, and boards, and more flexibility in the display on one s pins and boards and boards that are followed.	A	A	Class4
357	;) I think it could be better by being able to private message someone , though you could block the person from messaging if needed.	A	A	Class2
358	Also I think it could be better if a pin could be deleted from your group board (like for example if it was inappropriate and you didn t want it on your board), and also if you didn t need to follow a person back for them to be added to a group board.	A	A	Class1
359	Please add a back to top of page" button."	A	A	Class3
360	I love Pinterest, but this app crashes almost every time I use it ,	C	R	Class3
361	The app is hard to see clearly on my phone,	P	A	Class2
362	The only suggestions...fix the glitch that boots you out and shuts down your iPad on occasion, create main topic board to house boards as subtopics (e.g. Main topic 'decorating' and boards under this would be kitchen, bedroom, etc.) I just have so many boards it would make things more organized and easier to find.	C	A	Class3
363	The only issue with this app is the lack of ability to print a pin from within the app you have to open in safari and that is to many extra steps....please add a print button!	A	A	Class1
364	The mobile app is slow and crashes a lot, but I love it when it s not struggling.	P	A	Class1
365	Can you try to add some instructions or a replay for when you first join?	A	A	Class3
366	There is still a crashing issue on occasion and pins on my homepage refuse to load.	C	A	Class1
367	I learn a lot from what other folks post it lacks a reliable search function &amp; it needs to add a setting of BOARDS/PERSONS I FOLLOW.	A	A	Class2
368	The only bad thing about it is that you can t get on it without wifi.	P	A	Class3
369	Minus one star for occasional crashes of the app and I wish there was a better way to keep people from pinning links to spammy websites.	A	A	Class4
370	Please take off the new update where it recommends sending certain pins to people who may like it on your Facebook friends list.	A	A	Class3
371	I use Pinterest a lot, but the app is constantly crashing when I go to open a pin.	C	R	Class1
372	But I wish there were a way to organize pins within boards, like sub boards or something.	A	A	Class2
373	I enjoy using Pinterest on the iPad and iPhone but some features, like the ability to change the cover image of a board are missing.	A	A	Class1
374	I love Pintrest and the app version is laid out well, but it crashes all the time and sometimes takes several tries to reach the web page linked to the pin.	C	A	Class1
375	After update, takes longer for boards to load, sometimes the app crashes.	P	A	Class1
376	because it crashes now and then.	C	R	Class4
377	The only problem I have with it is that it randomly closes the app.	C	A	Class1
378	I wish you could still pin without opening.	A	A	Class2
379	I wish there was some type of messenger available.	A	A	Class1
380	It would be nice to be able to respond to pins that have been sent to us with a message.	A	R	Class1
381	i like the new update but it still crashes every so often.	C	A	Class1
382	I wish there was a way to take off your recently viewed categories.	A	R	Class4
383	s Fling , This version crashes repeatedly and completely shuts my iPad down.	C	A	Class1
384	The only improvement I suggest is to add the ability to zoom" in on the pictures after they have been pinned."	A	A	Class1
385	I have had the iPhone 4S and 5s, with both of them I had loading issues when saving an image that would freeze and continue to load hours after I have exited the app.	P	A	Class1
386	Wish the app would allow you to view in both portrait and landscape format.	A	A	Class1
387	Constantly crashes when viewed on my iPad.	C	R	Class4
388	Works awesome on my phone but crashes if you repin too quickly back to back.	C	A	Class2
389	Only bug I found was when I expand a pin and try to scroll down to the related pubs area, they sometimes won t load so I have to exit the pin and try again.	C	A	Class3
390	A bit glitchy sometimes so you may need to do an uninstall / reinstall but otherwise go for it.	C	R	Class1
391	The only thing I would love added to Pinterest overall is keywords because a lot of times the captions for the pin do not contain any information about what the pin is about and then there is no way to search for it.	A	A	Class3
392	I love this site but the app crashes every time I use it :( ,	C	R	Class1
393	The only problem is the newest update makes if a bit difficult to find and like things.	P	A	Class2
394	The update crashes sometimes, but not as much as it used to.	C	R	Class4
395	The only thing I would like to see added is a find" feature for every board considering how many pins I have now."	A	A	Class3
396	Could add feature that loads more pins when you reach the bottom and run out of pins!!!!!!!	A	A	Class3
397	The down side is that it does indeed crash on you everyonce in a while, not constant at all and doesn t pick up where you left off, and you will be lucky if you find that specific pin again.	C	A	Class3
398	I get frustrated because it crashes with some regularity.	C	R	Class4
399	It crashes constantly.	C	R	Class4
400	Wish you could save images that you are trying to pin!	A	A	Class3
401	Love getting a ideas for EVERYTHING, but some of the websites pinned do not work.	C	A	Class3
402	Crashes have been minimized in the last updates, but still crashes on my iPad.	C	R	Class1
403	Love the app but have also noticed that my tablet will automatically shut down only on the Pinterest site.	C	A	Class1
404	I just hope you can fix the crashing problem.	C	R	Class4
405	We really need an open in safari" button."	A	A	Class4
406	It s constantly crashing on me or not showing the pictures, just a bunch of colored tiles.	C	A	Class3
407	My only complaint is that you can t search your own pins or likes as you can on a computer.	A	A	Class2
408	I don t like the fact that it always crashes when I m on my iPad.	C	R	Class1
409	Please fix the crashes on the iPads an it would be worth that fifth star.	C	R	Class1
410	Not impressed with update, also need to put a sidebar on pins so you can see how far you have to scroll down to get to the bottom of a topic.	A	A	Class2
411	Please change it BACK to the APP opening when I pin in Safari and/or Chrome.	A	A	Class4
412	Please make an iPad HD version!!	A	A	Class2
413	\nGranted, all of my pins are from other interesting boards, but I don t like the idea of someone else adding something to my board.	A	A	Class4
414	I would like to post video using the copy and paste on my iPhone.	A	A	Class2
415	Love the app, but unfortunately the crashing problem from 2 versions ago is still a problem.	C	R	Class1
416	The only problem that I have noticed is that when you click to view a pin, read it the close it, it starts you back at the beginning of the list and not where you left off at.	C	A	Class4
417	Now we can t rename boards in the iPad app but we could before.	C	A	Class4
418	The app is easy to use, but does tend to crash alot on the iPhone, it s perfect on a PC or laptop though.	C	R	Class1
419	I don t know why I have so much trouble opening the pins?	P	A	Class3
420	I think it should be easier to open them and see the full content.	P	A	Class3
421	Love the concept of this app, but it crashes pretty frequently.	C	R	Class1
422	I use boards to pin tons of ideas as inspiration when I first start a project or begin planning a party, but it would be nice to have a way to rank the pins to narrow down the ones I want to focus on first!	A	R	Class4
423	It is very cool how we can touch a picture and then we get the three options on what we can to do, but is there any way that y all can put another option that saves a pin to the camera roll?	A	A	Class1
424	The app is little tough to learn at first, that s why only ?	P	R	Class4
425	We spend time organizing our boards but Pinterest fails to organizing themselves by not putting things in alphabetical order...please learn you ABC s. ,	C	A	Class4
426	I wish you could drag and drop pins between boards, and delete with pins with one click.	A	A	Class2
427	Love it but it crashes a lot :( ,	C	R	Class4
428	but every now and then I have to re search for something because it bumps me out to the home page.	P	A	Class3
429	\n\nThx, now, can you STOP asking me to rate Pinterest every third or fourth time I try to open it?	A	A	Class4
430	Just wish the scrolling down then back up just a little bit didn t bring the top menu bar back.	A	A	Class3
431	I just wish editing my boards was easier.	A	A	Class2
432	One thing, I would like to see the subscribers in order of appearance.	A	A	Class4
433	One issue I do have is sometimes when I pin a Lin and go back to it I can t necessarily get the pattern or recipe, not sure why.	C	A	Class4
434	My only problem is that some times it just suddenly closes out on me, and I have to wait a bit to open it again.	C	A	Class1
435	Can t figure out how to clean up my boards.	P	A	Class3
436	It crashes occasionally, but overall it s a great app!	C	R	Class4
437	That means I can t pin.	C	R	Class4
438	Just wish you didn t have to allow others to follow you unless you give permission or maybe allowed to have more secret boards.	A	A	Class2
439	I wish there was a pin button on my phone where I could pin things I see like I to when I m on my laptop (maybe there is one for the phone and I just haven t found it).	A	A	Class3
440	I had problems with the app freezing a lot before, but don t anymore.	C	R	Class2
441	I wish it were easier to move my pins from one of my boards to a new board I create.	A	R	Class3
442	No update has been done recently though, and until I read that the problem with Safari is fixed I will try to remember not to upgrade the system.	C	A	Class1
443	The only thing I suggest would be to update the look more often:) \nBut as far as the app I love it ,	A	A	Class2
444	Just wish it would stop crashing, and adding a side bar to scroll through boards would be nice.	A	A	Class3
445	It always crashes at the most inconvenient time.	C	R	Class4
446	Love Pinterest... I think it would be awesome to have the boards like now plus sub boards.	A	A	Class2
447	t know who you have recently hired to change your interface, but I suggest going back to the previous designer.	A	A	Class3
448	The problems with the folders is that if you touch one accidentally (like hit the one above) it pins I to it,before you had to hit the PIN button again which gave you the chance to make sure to hanger the folder with one tap, now you have to go in and delete and move it to the correct folder.	C	A	Class3
449	I just wish you could the app horizontally.	A	A	Class3
450	Not always clear about how to pin something or follow someone.	P	A	Class3
451	But it crashes A LOT.	C	R	Class4
452	Also, I can t update my board covers, and that should be brought back.	A	A	Class2
453	Do wish there was a way to move pins to different boards without having to repin them.	A	A	Class2
454	App logs out &amp; can t sign in from time to time.	C	A	Class1
455	Love the app but it crashes a little much.	C	R	Class1
456	My Pinterest worked just fine until I just updated it today, now nothing loads!!	C	A	Class2
457	Please fix or allow me to downgrade!	C	R	Class4
458	But LOTS of updating, and it will crash or freeze on you.	C	R	Class4
459	The bugs in the app have been fixed over time &amp; I have no complaints except for adding more than 3 secret boards.	A	R	Class3
460	We just need a list of categories and we don t need a picture of what the category is.	A	A	Class3
461	I love it, but every night while I m on it just crashes for no reason.	C	R	Class4
462	For the recipes or different DIY things it would be nice to be able to see at rating on how others felt about them or telling if they would try it again or not.	A	A	Class3
463	I can t see who is following specific boards, only generally who is following,	A	A	Class3
464	I just wish you could send multiple pins to one person at a time and the same pin to multiple people at once.	A	A	Class1
465	It would crash a lot more than it does now.	C	R	Class4
466	It does have some issues, such as the shut off in the middle of a pin and not loading at all until I close the app completely which also make me lose the place I have scrolled to.	C	A	Class2
467	I just don t like all the notifications for everything, but other than that, it s awesome!	A	A	Class1
468	I would like to see more categories for browsing it seems all of the DIY Crafts that are lumped together could be better sub divided.	A	A	Class4
469	Quilts, for instance, should have their own category.	A	R	Class4
470	Instead of just turning the screen orientation the app closes my whole iPad.	C	A	Class1
471	The only adjustment I would suggest would be to fix load time as the images sometimes take awhile to upload.	P	A	Class1
472	Please fix it so that it is compatible.	P	A	Class1
473	It crashes once in a while; about two times a week.	C	R	Class4
474	I had to Google it to discover that you have to tap the camera button, then the little image icon.	P	A	Class3
475	Please bring back the A Z tabs when looking for categorized pin boards.	A	A	Class2
476	Enjoy using on my iPhone and iPad but it still likes to crash.	C	A	Class1
477	When I try to load a video it almost always crashes.	C	A	Class1
478	Wish there were more secret boards available.	A	R	Class3
479	I like sharing info and ideas with others, however, the lack of privacy is an issue.	P	A	Class1
480	So, I d like more privacy settings that are already available on other social networking sites and Pinterest would be perfect.	P	R	Class1
481	How do I go back and submit my email address so I can write comments?	P	A	Class3
482	I don t know how to go back to where you tell me to give my email address.	P	A	Class3
483	Is there a way I can leave messages to other pinners?	P	A	Class3
484	But you should add chatting!	A	A	Class1
485	Wish I could select multiple pins when I need to edit my boards.	A	A	Class2
486	Prior to the update, it was crashing frequently, shutting down my iPad, then rebooting.	C	R	Class1
487	I only wish that you could remove previous pins from a board or move them to a different board, just so you can correct a finger slip or get rid of things that you didn t end up liking.	A	A	Class1
488	Please make the picture view adjustable since lage device took roll.	A	A	Class3
489	Need to see contacts profile pictures Need to fix the problem where people can see their contacts pictures	A	A	Class2
490	I am not able to add any, nor view any which have UTF8 chars in the name.	C	A	Class4
491	Good app but wont let me get wifi please make it on a tablet ,	A	A	Class2
492	Zero start Fail to load Continuously hangs and,I can t open this app .	C	A	Class1
493	Bhknb Y this application is not working properly on my phone	C	R	Class4
494	please increase data limit more than 12 m.b. kuldeep.	P	A	Class1
495	Please The Profile pic I don t want To anyone to see it Anyone i don t know but have my number !	A	A	Class2
496	Why it s works slowely?	P	A	Class1
497	Comm made easy Updating is the only problem.	C	A	Class1
498	Bug should be fixed I like this app but Its continuously giving error and stopped crashing please fix this bug.	C	A	Class1
499	Keeps crashing Not only did it crash, it also wiped my whole phone.	C	A	Class1
500	new update is worse I am using it on note3 and ever since I updated the new version I am unable to send songs to my contacts.	C	A	Class2
501	privacy is another issue.	P	A	Class1
502	Crashing It crashed 2 times in 10 minutes.	C	R	Class4
503	Very good app I wish it can work with two number in same phone or work with dual sim card for both number when it will be Work for dual sim card mobile plz.	A	A	Class1
504	Bakwas application Always not responding problem occurs can t shows messages.	C	A	Class3
505	But the problem is very slow running to update.	P	A	Class1
506	Add marble diagrams for Single operators.--	P	A	Class4
507	Change hasException to hasThrowable--	P	A	Class3
508	Trying to extend the Scheduler interface according- to the comments at -19.--	A	A	Class4
509	RunAsync method for outputting multiple values--	A	R	Class4
510	forEach with Action1 but not Observer--I re-read the MSDN docs and found the previous implementation wasn't complying with the contract.-I believe this now does.-	C	A	Class3
511	Extract UnsubscribeTester to top level--	P	R	Class4
512	Some cleaning up--	P	A	Class4
513	Trying to fix non-deterministic test--- not sure of a way other than putting Thread.sleep in here to give time after each CountDownLatch triggers for the process scheduler to execute the next line of each thread--	C	A	Class3
514	Fix Completable swallows- OnErrorNotImplementedException (-3904)--	C	A	Class4
515	Fix unit test after last() changed behavior--	C	A	Class2
516	Incoporate review suggestions.--Splits a compound unit test into to parts.-Uses mockito instead of a bespoke test object.-Removes unused import statements.-Changes the order of the Finally action w.r.t. onComplete/onError.-	P	A	Class3
517	Fixed byLine test to use line.separator system- property instead of \n.--	C	R	Class4
518	Add CompositeSubscription--- also a utility method for creating a Subscription around a Future-	A	A	Class4
519	Spare a few redundant calls in SleepingAction- around determining the delay value (-3903)--- Remove redundant outer conditional.-- Skip calling into System.currentTimeMillis(), which could potentially result in different values.-	P	R	Class4
520	Adding missing javadocs to TestSubject (-1322)--	P	A	Class3
521	Added takeLast to Observable--	A	R	Class4
522	Reduce duplication by making "schedule now" the- special case--Forwards to "schedule later" with delay of 0 now.-	P	A	Class3
523	Wraps DoOnEach in a SafeObserver--This commit leverages the SafeObserver facility to get the desired-behavior in the face of exceptions. Specifically, if any of the-operations performed within the doOnEach handler raises an exception,-that exception will propagate through the observable chain.-	C	A	Class2
524	Switch to AtomicIntegerFieldUpdater and volatile- int, instead of AtomicBoolean--	P	A	Class3
525	Refactored TakeUntil to use TakeWhile.--	P	A	Class3
526	Removed window between the two synchronized blocks.--	P	A	Class3
527	Added license header to OperationBuffer.--	P	A	Class2
528	---	P	R	Class4
529	Forward subscription of wrapped subscriber--	P	R	Class4
530	additions to tests--	P	A	Class3
531	TakeWhile protect calls to predicate--	C	R	Class4
532	subscribe methods with typed Action arguments--	P	R	Class4
533	Restructure into smaller files--	P	A	Class2
534	Set threads to daemons so they don't prevent system- from exiting--- This applies to any pools RxJava itself creates. It will be up to users to do this for Executors they inject.-	C	A	Class1
535	Confusing Javadoc for `toObservable(Future)`- methods-	P	R	Class4
536	Implement a cached thread scheduler using event- loops--	A	A	Class2
537	non-deterministic- testUserSubscriberUsingRequestAsync--fix non-deterministic failures of BackpressureTests.testUserSubscriberUsingRequestAsync--I was able to replicate the occasional failure by putting it in a tight loop. With these changes it no longer fails.-	C	A	Class1
538	Fix multiple subscription bug on operation filter--A new subscription must be created on every subscribe call, otherwise any-subscribe call after the first directly fails.-	C	A	Class3
539	Update Observable.isInternalImplementation, get rid- of NullPointerException--NullPointerException has been encountered during my tests. It is because java.lang.Class.getPackage() may return null "... if no package information is available from the archive or codebase" (documented feature).-	C	A	Class3
540	Perf Tests with JMH--	P	A	Class3
541	Add operators to create Observables from- BroadcastReceiver--it allows to listen global and local (with support LocalBroadcastManager) broadcasts-	A	A	Class2
542	unit tests for covariance--- refactoring so not everything for the entire Observable ends up in a single class-	P	A	Class3
543	Remove Unnecessary Subscription--- be explicit for error case in JoinObserver-	P	R	Class4
544	Fixed issue -417--	C	R	Class4
545	add synchronous test of resubscribe after error--	P	A	Class1
546	added variance to Action*, too--	P	R	Class4
547	Cleanup Javadocs--	P	A	Class4
548	Added ChannelObservable.get--	A	R	Class4
549	Added create with initial capacity, minor fix--	C	A	Class4
550	Move last 6 remaining unit tests out.--	P	A	Class3
551	Delay: error cut ahead was not properly serialized--	C	A	Class4
552	Switched to a default scheduler that actually works- together with this operator.--	C	A	Class1
553	updated a test and added another one, trying to get- the expected behavior right--	P	A	Class3
554	1.x: fix Completable.onErrorComplete(Func1) not- relaying function crash (-4027)--	C	R	Class4
555	Better naming, and new test--... using to compare 0.19 and 0.20 so want in both.-	P	A	Class4
556	Add unit tests for recursive scheduler usage--These tests came from @mairbek	P	A	Class2
557	Implemented periodic scheduling, too. Needs testing- now.--	A	A	Class2
558	fix sticky intent duplication, add tests for- OperatorBroadcast--	C	A	Class3
559	Make Functions.from typesafe--	P	R	Class4
560	Add Single.doAfterTerminate()--	A	R	Class4
561	made the public window methods more generic via the- basic (lol) super/extends fluff; also simplified api by removing a few- useless super definitions (there's no super of Opening and Closing)--	P	A	Class3
562	Baseline Performance Tests--Start of suite of general performance tests for comparing overall changes.-	P	A	Class1
563	made WINDOW_MAKER typed--	P	R	Class4
564	Change order of generics for Func from R, T to T, R- to match C- Rx--	P	A	Class2
565	Removed synchronized block as per RxJava guidelines- (6.7).--	P	A	Class3
566	Better name for worker class running scheduled- actions--	P	A	Class4
567	CurrentThreadScheduler Memory Leak Fixed-MIME-Version: 1.0-Content-Type: text/plain; charset=UTF-8-Content-Transfer-Encoding: 8bit--- Current/Immediate/NewThread/Executor Schedulers are passing unit tests-- Current/NewThread/Executor Schedulers do not leak memory on the recursion test (Immediate can‚Äôt be used for recursion otherwise it stack overflows)-	C	A	Class1
568	Refactoring for consistent implementation approach.--Combined ObservableExtensions into Observable to match how Rx works (Observable.* methods)-	P	R	Class4
569	Performance refactoring: OperatorSubscribeFunction--- migrated Func1 to OperatorSubscribeFunction for internal operator implementations-- do not wrap with AtomicObserver when it's a trusted operator--https://github.com/Netflix/RxJava/issues/104-	C	R	Class4
570	javadoc interlinkings and other javadoc- improvements--	P	A	Class3
571	use Java Subject<T, R> as contravariant in T and- covariant in R--	P	R	Class4
572	Prevent direct instantiation of BlockingObservable- via no-arg constructor--- also questioning why to allow extending this and would like to make it a private constructor-	P	R	Class4
573	GroupBy GroupedObservables should not re-subscribe- to parent sequence--https://github.com/Netflix/RxJava/issues/282--Refactored to maintain a single subscription that propagates events to the correct child GroupedObservables.-	C	R	Class4
574	Handle concurrent unsubscription in drain (avoid- NPE).--	P	R	Class4
575	tidying up AbstractOnSubscribe javadocs--	P	A	Class3
576	Fix termination race condition in- OperatorPublish.dispatch--	C	R	Class4
577	Unlock in finally block--	C	R	Class4
578	Incorporate review suggestions.--- Changes finally0 to finallyDo.-- Removes unnecessary subscription-wrapping.-- Handle exceptions in onCompleted/onError-	P	R	Class4
579	As per suggestions: Added single static instance of- ExecutorService for delayed posting Introduced ScheduledIOSAction to enable- CompositeSubscription--	A	A	Class4
580	Refactor test to use CountDownLatch instead of- Thread.sleep--	P	A	Class3
581	Add doOnSubscribe for Single--	A	R	Class4
582	Beef up UnsubscribeTester--	P	R	Class4
583	Fixed issue -799 - Added break to possibly-infinite- loop in CompositeException.attachCallingThreadStack--	C	A	Class1
584	Fix the initialization of Completable.complete()- (-4146)--	C	R	Class4
585	1.x: ConcatMapEager allow nulls from inner- Observables.--	P	R	Class4
586	Implement Scheduler method with dueTime--- added method: schedule(T state, Func2<Scheduler, T, Subscription> action, Date dueTime)-	A	R	Class4
587	Fix non-deterministic unit test--	P	A	Class3
588	Fix autoConnect calling onStart twice.--	C	A	Class3
589	1.x: Expose Single.lift()--	A	R	Class4
590	Implemented range operator--	A	A	Class3
591	ObserveOn/SubscribeOn unit tests--	P	A	Class3
592	GroupBy Test Improvement--ObserveOn was the wrong mechanism for delaying behavior as it was relying on the buffering of observeOn.-Now using delay() to delay the group since observeOn no longer buffers.-	P	R	Class4
593	Fixed javadoc and comments, cleaned up a bit, and- tried to fix synchronization.--	P	A	Class4
594	Add finally0 to Observable.java .--	P	R	Class4
595	Add takeUntil support in Single--	A	R	Class4
596	ObserveOn and SubscribeOn concurrency unit tests--- these are very rudimentary and may have a determinism problem due to the Thread.sleep-	P	A	Class3
597	avoiding some synchronization on combineLatest--	P	R	Class4
598	Fixed a bug in the test scheduler that happened- when advancing time by a too little amount--	C	A	Class4
599	Non-blocking implementation of ScheduledObserver--	A	R	Class4
600	Conditionals: Fix all but 2 tests--	C	A	Class2
601	Conditionals: Fix all but 2 tests--	P	R	Class3
602	Fix for back pressure on the alternate- subscription.--	C	A	Class4
603	add error handling for onNext failure so exceptions- don't get thrown up the stack but instead via onError--	C	A	Class1
604	Add Single.fromCallable()--	A	R	Class4
605	remove warnings and cleanup--	P	A	Class4
606	HBASE-2513 hbase-2414 added bug where we'd- tight-loop if no root available	C	R	Class4
607	Remove spam in HCM and fix a- list.	C	A	Class3
608	HBASE-11813 CellScanner-advance may overflow- stack--	C	R	Class4
609	HBASE-11671 TestEndToEndSplitTransaction fails on- master (Mikhail Antonov)--	C	R	Class4
610	HBASE-10010 eliminate the put latency spike on- the new log file beginning	C	R	Class4
611	HTableDescriptor equals method fails- if results are returned in a different order; REVERT -- OVERCOMMITTED--	C	A	Class3
612	HBASE-9366 TestHTraceHooks.testTraceCreateTable- errors out sometimes.	C	R	Class4
613	Clean up CompressionTest to not- directly reference DistributedFileSystem-	P	A	Class4
614	HBASE-5857 RIT map in RS not getting cleared- while region opening	C	R	Class4
615	HBASE-13958 RESTApiClusterManager calls kill()- instead of suspend() and resume()--	C	R	Class4
616	HBASE-5549 HBASE-5572 Master can fail if- ZooKeeper session expires (N Keywal)	C	R	Class4
617	HBASE-14807 TestWALLockup is flakey--	C	R	Class4
618	HBASE-2040 Fixes to group commit	C	R	Class4
619	TestHBaseCluster fails with- IllegalMonitorStateException. Fix regression introduced by HADOOP-1397.-	C	A	Class3
620	HBASE-2806 DNS hiccups cause uncaught NPE in- HServerAddress-getBindAddress	C	R	Class4
621	LRU-style map for the block cache	P	R	Class4
622	Filter-filterRow is called too often,- filters rows it shouldn't have -- reversed it for a moment; it may have- broken things -- not sure yet	C	A	Class4
623	HBASE-3070 Add to hbaseadmin means of shutting- down a regionserver	A	R	Class4
624	HBASE-2397 Bytes.toStringBinary escapes printable- chars	C	R	Class4
625	Take last version of the hbase-1249- design doc. and make documentation out of it--	P	A	Class3
626	Table name isn't checked in- isTableEnabled/isTableDisabled-	P	A	Class1
627	[Usability]: Instructions in- CompactionTool no longer accurate because of namespaces	P	A	Class2
628	Pluggable compaction and scan policies- via coprocessors-	A	A	Class3
629	HBASE-2787 PE is confused about flushCommits	C	R	Class4
630	HBASE-10606 Bad timeout in- RpcRetryingCaller-callWithRetries w/o parameters	C	R	Class4
631	Eventually all online snapshots fail- due to Timeout at same regionserver.--Online snapshot attempts would fail due to timeout because a rowlock could not be obtained. Prior to this a-cancellation occurred which likely grabbed the lock without cleaning it properly. The fix here is to use nice cancel-instead of interrupting cancel on failures.--	C	A	Class1
632	HBASE-11920 Add CP hooks for ReplicationEndPoint--	A	R	Class4
633	HBASE-8383 Support lib/*jar inside coprocessor- jar	A	R	Class4
634	HBASE-10066. Use ByteArrayOutputStream-writeTo- where appropriate	P	R	Class4
635	TestCatalogJanitor occasionally fails;- PATCH THAT ADDS DEBUG AROUND FAILING TEST-	P	A	Class3
636	With HFile v2, the region server will- always perform an extra copy of source files	P	R	Class4
637	minor edit of regionserver logging- messages	P	A	Class4
638	RESTServer should handle the loginUser- correctly-	C	A	Class2
639	IndexedTable delete fails when used in- conjunction with RowLock()	C	A	Class3
640	Caching set on Scan object gets lost- when using TableMapReduceUtil in 0.95+ (Ishan Chhabra)--	C	A	Class2
641	Make in-memory table scanning faster ;- reverted 20110726_1938_MemStore.patch till we figure why it seems to slow- tests	P	A	Class1
642	Result implements CellScannable;- rather it should BE a CellScanner--	P	R	Class4
643	HBASE-6400 Add getMasterAdmin() and- getMasterMonitor() to HConnection (Enis)	A	R	Class4
644	HBASE-2156 HBASE-2037 broke Scan	C	R	Class4
645	[WINDOWS] TestStripeStoreFileManager- fails on windows-	C	A	Class2
646	createUnassignedRegion doesn't- make sure existing znode is in the right state (Karthik- Ranganathan via JD)	C	A	Class3
647	Possible data loss due to non-handled- DroppedSnapshotException for user-triggered flush from client/shell	C	A	Class1
648	Pair does not deep check arrays for- equality--	C	A	Class3
649	HBASE-8355:- BaseRegionObserver-pre(Compact|Flush|Store)ScannerOpen returns null (Andrew- Purtell, Jesse Yates)	C	R	Class4
650	Replace HBaseFsck.debugLsr() in- TestFlushSnapshotFromClient with FSUtils.logFileSystemState()	P	A	Class3
651	Heap occupancy based client pushback--	A	A	Class1
652	Tool to look at HLogs -- parse and- tail -f; added part 1, some fixup of hlog main	P	R	Class4
653	Alter table add cf doesn't do- compression test	C	A	Class2
654	HADOOP-2308 null regioninfo breaks meta scanner	C	R	Class4
655	TestRegionMergeTransactionOnCluster- failed in trunk build -4010	C	A	Class2
656	HBASE-2365 Double-assignment around split	C	R	Class4
657	Add support for 1- and 2-byte integers- in OrderedBytes and provide types	A	A	Class2
658	Fixing broken build... forgot to add- JVMClusterUtil, etc.	C	A	Class1
659	[WINDOWS] Timed-out processes exit- with non-zero code causing HealthChecker to report incorrectly. ADDENDUM- patch to fix flaky test	C	A	Class2
660	Fix some misspells and extraneous- characters in logs; set some to TRACE	P	A	Class4
661	HBASE-4169 FSUtils LeaseRecovery for non HDFS- FileSystems; added 4169-correction.txt correction	C	R	Class4
662	HBASE-10449 Wrong execution pool configuration in- HConnectionManager	C	R	Class4
663	Timeouts for row lock and scan should- be separate	P	A	Class3
664	Support checksums in HBase- block cache--Author: Dhruba--Summary:-HFile is enhanced to store a checksum for each block. HDFS checksum verification-is avoided while reading data into the block cache. On a checksum verification-failure, we retry the file system read request with hdfs checksums switched on-(thanks Todd).--I have a benchmark that shows that it reduces iops on the disk by about 40%. I…	A	R	Class4
665	TestRowFilterAfterWrite erroneously- sets master address to 0.0.0.0:60100 rather than relying on conf	C	A	Class4
666	HBASE-8033 Break TestRestoreSnapshotFromClient- into TestRestoreSnapshotFromClient and TestCloneSnapshotFromClient (Ted Yu)	P	R	Class4
667	Minor typo in Bytes- IllegalArgumentException throw	C	A	Class4
668	HBASE-9287 TestCatalogTracker depends on the- execution order	P	R	Class4
669	Make the Replication Service pluggable- via a standard interface definition	P	A	Class3
670	Add login code to HBase Canary tool	A	A	Class3
671	More log pruning--M conf/log4j.properties- Make ZKW log at INFO-level-M src/main/java/org/apache/hadoop/hbase/master/AssignmentManager.java- Log message cleanup.-M src/main/java/org/apache/hadoop/hbase/master/HMaster.java- Remove excessive hostname+port qualifier on master for zk messages-M src/main/java/org/apache/hadoop/hbase/master/MasterFileSystem.java- Log message cleanup-M src/main/java/org…	P	A	Class4
672	force unassign can confirm region- online on any RS to get rid of double assignments	C	A	Class4
673	AsyncProcess.buildDetailedErrorMessage concatenates strings using + in a loop-	P	A	Class3
674	TestColumnSchemaModel and- TestTableSchemaModel test cases are failing with IBM IBM Java 6	C	A	Class4
675	Add bloomfilters	A	R	Class4
676	KeyOnlyKeyValue-toString() passes- wrong offset to keyToString()	C	A	Class4
677	HBASE-5259 Normalize the RegionLocation in- TableInputFormat by the reverse DNS lookup (Liyin Tang)	P	R	Class4
678	Master rewrite; should have removed- safe-mode from regionserver-side too -- Needed to remove the wait up in top- of flush and compactions threads-- used to wait on safe mode... was stuck- there	C	A	Class2
679	Useless exception in HMaster on- startup	P	A	Class4
680	ExploringCompactionPolicy can get- stuck in rare cases.	C	A	Class4
681	Fix assigning a region to multiple- servers	C	A	Class1
682	Parallelize Server Requests on HBase- Client-	P	A	Class1
683	HBASE-1386 NPE in housekeeping	C	R	Class4
684	MetaReader.tableExists should not- return false if the specified table regions has been split	C	A	Class3
685	HBASE-2057 Cluster won't stop	C	R	Class4
686	Fix flaky TestFromClientSide test by- forcing region assignment	C	A	Class1
687	HashFunction inadvertently destroys- some randomness; REVERTING	C	A	Class1
688	fix spurious 400s produced by test	C	A	Class4
689	HBASE-3591 completebulkload doesn't honor generic- -D options	C	R	Class4
690	FSUtils-waitOnSafeMode can incorrectly- loop on standby NN	C	A	Class3
691	HBASE-1537 Intra-row scanning; apply limit over- multiple families	A	R	Class4
692	For ICV gets, first look in MemStore- before reading StoreFiles (Prakash via jgray)	P	R	Class4
693	HBASE-920 Make region balancing sloppier	P	R	Class4
694	Provide Client API to explicitly lock- and unlock rows	A	A	Class3
695	HBASE-1552 provide version running on cluster via- getClusterStatus	A	R	Class4
696	Cleanup thrift server; remove Text and- profuse DEBUG messaging	P	A	Class4
697	Use same criteria for clearing meta- cache for all operations (addendum)	P	A	Class2
698	Add integration test for bulkload- with replicas	P	A	Class3
699	Scan(Scan) copy constructor does not- copy value of cacheBlocks	C	A	Class3
700	Fix broken tests (setWriteBuffer now- throws IOE)	C	A	Class1
701	SSH and DisableTableHandler happening- together does not clear the znode of the region and RIT map (Rajesh)	C	A	Class4
702	HBASE-3429 HBaseObjectWritable should support- arrays of any Writable or Serializable, not just Writable[]	C	R	Class4
703	AssignmentManager's handleRegion- should respect the single threaded nature of the processing	C	A	Class4
704	SSH doesn't need to scan meta if not- using ZK for assignment--	P	R	Class4
705	[replication] Change replication RPC- to use cell blocks	C	A	Class3
706	Support running an embedded- ThriftServer within a RegionServer	A	A	Class1
707	Support visibility expressions on- Deletes	A	A	Class1
708	HBASE-1722 Add support for exporting HBase- metrics via JMX	A	R	Class4
709	HBASE-8921 [thrift2] Add GenericOptionsParser to- Thrift 2 server	A	R	Class4
710	HBASE-12176 WALCellCodec Encoders support for- non-KeyValue Cells (Anoop Sam John)--	A	R	Class4
711	HBASE-9999 Add support for small reverse scan	A	R	Class4
712	Add multi get to RemoteHTable	A	A	Class3
713	HBase Export: Add ability to export- specific Column Family; Turn Block Cache off during export; improve usage doc	A	A	Class2
714	Test deleting the percolate type differently.- Instead of checking the types exist api, register a DocumentTypeListener that- notifies when percolate queries have been cleared.--	P	A	Class3
715	Cluster Health API: Add `wait_for_nodes` (accepts- "N", "<N", ">N", "<=N", and ">=N"), closes -269.--	A	R	Class4
716	improve handling of memory caching with file- system, only force compound file when really needed (when an extension that- exists within the compound file is part of the memory cached extensions)--	P	A	Class1
717	Added GeoDistance test which verifies the- difference in behaviour between ARC and PLANE, causing elliptical results--	P	A	Class3
718	NullPointerException for invalid faceted query,- closes -1136.--	A	R	Class4
719	[TEST] Added test that verifies data integrity- during and after a simulated network split.--	P	A	Class1
720	Cut over StringScriptDataComparator to use- BytesRef instead of Strings--Closes -2920-	C	R	Class4
721	clean code--	P	A	Class4
722	test: fix and simplify logic--	C	A	Class4
723	fix cluster state mapping informaton, return it- with the mapping name as key and source field--	C	A	Class4
724	Optimize aliases processing	P	R	Class4
725	Fix- AckClusterUpdateSettingsIT.testClusterUpdateSettingsAcknowledgement() after- changes in -14259--Closes -14278-	C	R	Class4
726	add hasSingleArrayBackingStorage allow for- optimization only when there really is a single array, and not when there is- a multi dimensional one--	P	A	Class3
727	[TEST] renamed variables in ScriptServiceTests--	P	A	Class4
728	Fix typo in Hunspell logging--	P	A	Class2
729	inital support for zen discovery module- (multicast discovery implemented)--	A	A	Class3
730	Simplify TestCluster--TestCluster now doesn't use any reference counting anymore and-testcluster names are based on creation time to prevent confilcts if-builds hang.-	P	A	Class3
731	Tests: Add test for parsing "_name" field in- RangeQueryParser--	P	A	Class3
732	[TEST] fixed TestCluster size() javadocs--	P	R	Class4
733	Query DSL: Add `and`, `or`, and `not` filters,	A	A	Class3
734	clean-up long values--	P	R	Class4
735	Fix file handle leak in readBlob method of- AbstractFsBlobContainer--	C	A	Class2
736	Added clear scroll api.--The clear scroll api allows clear all resources associated with a `scroll_id` by deleting the `scroll_id` and its associated SearchContext	A	A	Class3
737	Small cleanup--	P	A	Class4
738	Allow to configure a common logger prefix using- `es.logger.prefix` system prop, closes -360.--	A	R	Class4
739	fix name--	P	A	Class4
740	introduce read/writeSharedString while streaming- currently, we treat all strings as shared (either by full equality or- identity equality), while almost all times we know if they should be- serialized as shared or not. Add an explicitly write/readSharedString, and- use it where applicable, and all other write/readString will not treat them- as shared relates to -3322--	C	R	Class4
741	Change default operator to "or" for- "low_freq_operator" and "high_freq_operator" parameters for "common" queries-	C	A	Class2
742	add a marker CachedFilter this allows to easily- and globally check if we cache a filter or not, all filter caching uses this- marker interface--	P	A	Class1
743	Added support for acknowledgements to update- cluster settings api--As a side note, the internal reroute call is now part of the ack mechanism. That means that if the response contains acknowledged flag, the internal reroute that was eventually issued was acknowledged too. Also, even if the request is not acknowledged, the reroute is issued before returning, which means that there is no need to m…	A	A	Class2
744	Http Transport: Allow to configure- `max_header_size`, `max_initial_line_length`, and `max_chunk_size`, closes- -1174.--	A	R	Class4
745	Add missing index name to indexing slow log--This was lost in refactoring even on the 2.x branch. The slow-log-is not per index not per shard anymore such that we don't add the-shard ID as the logger prefix. This commit adds back the index-name as part of the logging message not as a prefix on the logger-for better testabilitly.	C	A	Class2
746	Added KeywordRepeatFilter that allows emitting- stemmed and unstemmed versions of the same token if stemmers are used-	A	A	Class3
747	Catch AmazonClientExceptions to prevent- connection loss If the AWS client throws an exception (e.g: because of a DNS- failure) it will end up killing the rejoin thread and stop retrying which can- lead to a node getting stuck unable to rejoin the cluster.	C	A	Class1
748	zen disco: support for a node to act as a client- (and not become master) using discovery.zen.master setting (default to true).- It will automatically be set to false when node.client is set to true.--	A	R	Class4
749	Facets: deprecation.--Users are encouraged to move to the new aggregation framework that was-introduced in Elasticsearch 1.0.	P	R	Class4
750	Translog: Implement a file system based translog- and make it the default,	A	A	Class1
751	Introduced common test methods in- MatchedQueriesTests (e.g. createIndex, ensureGreen, refresh, assertHitCount)--	P	R	Class4
752	Migrating NodesInfo API to use plugins instead of- singular plugin--In order to be consistent (and because in 1.0 we switched from-parameter driven information to specifzing the metrics as part of the URI)-this patch moves from 'plugin' to 'plugins' in the Nodes Info API.-	P	A	Class2
753	Fix parsing of file based template loading--We support three different settings in templates--* "settings" : { "index" : { "number_of_shards" : 12 } }-* "settings" : { "index.number_of_shards" : 12 }-* "settings" : { "number_of_shards" : 12 }--The latter one was not supported by the fix in -4235--This commit fixes this issue and uses randomized testing to test any of the three cases above when ru…	C	A	Class3
754	refactor sub fetch phase to also allow for hits- level execution--	A	R	Class4
755	support yaml detection on char sequence--	A	R	Class4
756	[TEST] Stabelize MoreLikeThisActionTests--The `testCompareMoreLikeThisDSLWithAPI` test compares results from query-and API which might query different shards. Those shares might use-different doc IDs internally to disambiguate. This commit resorts the-results and compares them after stable disambiguation.-	C	A	Class2
757	Percolator response now always returns the- `matches` key.	C	A	Class3
758	add debug log if using compressed stored fields--	P	R	Class4
759	If matching root doc's inner objects don't match- the `nested_filter` then the `missing` value should be used to sort the root- doc.	A	A	Class3
760	[TEST] Don't delete data dirs after test - only- delete their content	C	A	Class4
761	Improved test, printed out potential shard- failures--	P	A	Class3
762	only pull Fields once from the reader--	C	A	Class4
763	Optimize multiple cluster state processing on- receiving nodes Nodes that receive the cluster state, and they have several- of those pending, can optimize and try and process potentially only one of- those.	P	R	Class4
764	Fix- `indices.recovery.concurrent_small_file_streams` not being dynamically- settable--Fixes -4094-	C	A	Class3
765	Added support for acknowledgement from other- nodes in open/close index api--The open/close index api now waits for an acknowledgement from all the other nodes before returning its response, till the timeout (configurable, default 10 secs) expires. The returned acknowledged flag reflects whether the cluster state change was acknowledged by all the nodes or the timeout expired before.	P	R	Class4
766	move DatabaseReaders initialization to- IngestGeoIpPlugin-onModule--	P	R	Class4
767	use the proper token stream to return--	C	A	Class3
768	rename node to DiscoveryNode--	P	R	Class4
769	Testing: Add test rule to repeat tests on binding- exceptions--Due to the possibility of ports being already used when choosing a-random port, it makes sense to simply repeat a unit test upon a bind-exception.--This commit adds a junit rule, which does exactly this and does not-require you to change the test code and add loops.	C	A	Class1
770	Don't allow unallocated indexes to be closed	C	A	Class3
771	Tests: Use all found index files instead of- static list for static bwc tests--It is a pain to add a new static index, and then have to update the old-index test. This removes the need for the latter step.	P	A	Class3
772	add an index level setting to disable/enable- purging of expired docs	A	A	Class2
773	Remove Infinity values for Range facets when no- docs match the range,	P	A	Class3
774	Added UNICODE_CHARACTER_CLASS support to Regex- flags. This flag is only supported in Java7 and is ignored if set on a java 6- JVM	A	A	Class3
775	BytesStreamOutput default size should be 2k- instead of 32k We changed the default of BytesStreamOutput (used in various- places in ES) to 32k from 1k with the assumption that most stream tend to be- large. This doesn't hold for example when indexing small documents and adding- them using XContentBuilder (which will have a large overhead).--Default the buffer size to 2k now, but be relatively agg…	P	A	Class2
776	Sorting on _score in the URI format is reversed,	C	A	Class2
777	Changed GeoEncodingTests to ensure accuracy- always >1mm due to rounding errors with very small numbers--	C	A	Class2
778	Fixed resolving closest nested object when- sorting on a field inside nested object--	C	A	Class1
779	Fix RobinEngineIntegrationTest - missed to- explicitly create the index--	C	A	Class3
780	Fix NPE in RangeAggregator--	C	R	Class4
781	Internal: use AtomicInteger instead of volatile- int for the current action filter position--Also improved filter chain tests to not rely on execution time, and made filter chain tests look more similar to what happens in reality by removing multiple threads creation in testTooManyContinueProcessing (something we don't support anyway, makes little sense to test it)	C	A	Class4
782	Remove dead code and add missing @Override- annotations--	P	A	Class3
783	[TEST] Re-add rebalance disable setting in- RecoveryFromGatewayTests--	P	A	Class3
784	fix a bug in new checksum mechanism that caused- for replicas not to retain the _checksums file. Also, now that checksums are- widely used, consider files without checksums as ones that need to be- recovered--	C	A	Class2
785	Fielddata: Remove- BytesValues.WithOrdinals.currentOrd and copyShared.--These methods don't exist in Lucene's sorted set doc values.	P	R	Class4
786	Recovery Settings: Change settings (still support- old settings) and allow for more dynamic settings	P	A	Class3
787	optimize boolean queries when possible--	P	A	Class3
788	Remove get index templates deprecated methods In- 0.90.4, we deprecated some code:--* `GetIndexTemplatesRequest-GetIndexTemplatesRequest(String)` moved to `GetIndexTemplatesRequest-GetIndexTemplatesRequest(String...)`-* `GetIndexTemplatesRequest-name(String)` moved to `GetIndexTemplatesRequest-names(String...)`-* `GetIndexTemplatesRequest-name()` moved to `GetIndexTemplatesRequest-names()`--* `Ge…	P	R	Class4
789	use custom similarity in search (if there is one)--	A	A	Class4
790	improve memcached test--	P	A	Class3
791	Allow for plugins to register REST filter (better- support with async execution and some renaming)	A	A	Class2
792	lucene 4: Fixed- BitsetExecutionChildQuerySearchTests class.--	C	R	Class4
793	Shard Allocation: Closed indices are not properly- taken into account when rebalancing, closes -858.--	C	A	Class3
794	Allow additional settings for the node in- ESSingleNodeTestCase--This change adds a method that extending classes can override to provide additional settings-for the node used in a single node test case.-	A	A	Class1
795	remove equals/hashcode as part of Pipeline and- adapt tests--Only MutateProcessor implemented equals / hashcode hence we would only use that one in our tests, since they relied on them. Better to not rely on equals/hashcode, drop them and mock processor/pipeline in our tests that need them. That also allow to make MutateProcessor constructor package private as the other processors.-	P	A	Class3
796	pass on node seed to the node level settings in- TestCluster--	P	R	Class4
797	Fix test failure.--	C	A	Class3
798	fixed issue from merge--	C	A	Class3
799	add anotehr test--	P	A	Class3
800	Catch and Log RejectedExecutionException in async- ping--	P	R	Class4
801	Rename Engine-seacher() into- Engine-acquireSearcher()--The name should reflect that the caller is responsible for-releaseing the searcher again.-	P	A	Class4
802	add "same" thread pool type (really, just for- testing)--	P	R	Class4
803	Histogram Facet: Allow to define a key field and- value script,	A	A	Class3
804	remove unused code--	P	A	Class4
805	Mapping: When _all is disabled, optimize to not- gather all entries,	P	R	Class4
806	Fix possible exception in toCamelCase method--	C	A	Class2
807	Randomize node level setting per node not per- cluster--	P	A	Class3
808	Aggregations: change to default shard_size in- terms aggregation--The default shard size in the terms aggregation now uses BucketUtils.suggestShardSideQueueSize() to set the shard size if the user does not specify it as a parameter.	P	R	Class4
809	add peer recovery status to the indices status- API exposing both on going and summary when recovering from a peer shard--	A	A	Class1
810	Tests: Improve test coverage.	P	A	Class3
811	increase netty worker count to default to the- updated value netty defaults to--	P	R	Class4
812	[Test] make recovery slow down in- rerouteRecoveryTest aware of index size--	P	A	Class3
813	make test less evil--	P	A	Class3
814	tests repaired--	C	A	Class2
815	fields are protected--	P	A	Class2
816	nullable problems: disable warnings on- "complex" getters/setters	C	A	Class1
817	annotation default value parsing fixed--	C	A	Class4
818	cleanup (IDEA-90461)--	C	R	Class4
819	IDEA-70843 (fix Hector slider for GTK+ L&F)--	C	R	Class4
820	additional null check--	C	A	Class3
821	just one more DnDEnabler little fix :)--	C	R	Class4
822	add suggestions for literal expressions-	C	A	Class2
823	disable pattern configuration for the same- named packages	C	A	Class4
824	gradle: correctly set TestModuleProperties for- modules containing '-' in names	C	A	Class4
825	Replace instanceof template variable with- variable segment--	P	A	Class3
826	Make is possible to enhance color schemes from- plugin in non-intellij environment (e.g. upsource)--	A	A	Class4
827	cleanup--	P	A	Class4
828	cleanup--	P	R	Class4
829	Memory leak fixed. Area instances connected to- project and module haven't been disposed at their disposal.--	C	A	Class1
830	Renaming preview files--	P	A	Class3
831	implement open hash addressing in index leaf- page to avoid large moves--	P	R	Class4
832	intellilang avoid costly service lookups--	P	R	Class4
833	IDE hang on file structure--	C	A	Class1
834	don't suggest 'convert to groovy-style property- access' inside closure--	C	A	Class4
835	Find Jar On The Web: Looking For- Libraries progress can't ve cancelled--	C	A	Class4
836	move statement should be enabled when moving to- the end of file--	C	A	Class2
837	NPE--	C	R	Class4
838	refactor name: it could be any RC--	P	A	Class4
839	diff: better name for default diff tool--	P	A	Class4
840	ui: use setter--	P	A	Class3
841	Added icons count on- folders in thumbnails view, Added EditExternaly to editors actions--	C	A	Class3
842	IDEADEV-20992--	C	R	Class4
843	fixed Assignment can be replaced with- augmented assignmet breaks context--	C	A	Class4
844	Extract Method in middle of expression- generates broken code--	C	A	Class1
845	move suppress/settings intention down	C	A	Class3
846	Typos--	P	R	Class4
847	FileNameCache: enable caching always don't- store common prefix (saves 8 entry bytes vs. less prefix average length)--	P	A	Class3
848	fixed django template commenter again	C	A	Class2
849	fix indefinite loop	C	A	Class1
850	StackOverflow fixed--	C	A	Class2
851	use common ExceptionUtil--	P	A	Class2
852	Fix for upsource--	C	A	Class3
853	we should find android module when- platform is specified--	C	A	Class1
854	formatting of injected code refactored	P	A	Class3
855	Maven run configuration - profiles- list gets randomly re-ordered after closing and opening project--	C	A	Class2
856	make find toolwindow work in dumb mode and- correctly navigate--	C	A	Class2
857	aware of not sourcemap file--	P	R	Class4
858	Don't offer to download source by maven for- artifact with 'system' scope--	P	R	Class4
859	Unable to save settings after upgrade- to 2016.1 (cherry picked from commit 5b98073)--	C	A	Class1
860	better messages format--	P	A	Class3
861	title changed--	P	A	Class4
862	Deadlock (SoftWrapApplianceManager)--Breaking potentially endless loop and report an error-	C	A	Class1
863	SVN: configure branches NPE--	C	A	Class3
864	reorder instructions, maybe it'll fix strange- IMSE--	C	A	Class4
865	TreeUi: NPE when in showCentered() no visible- rows in tree--	C	A	Class3
866	NPE fix--	C	R	Class4
867	fix--	C	R	Class4
868	Added code completion test.--	P	A	Class3
869	fragments with differences in comments only are- considered equivalent--	A	R	Class4
870	optimization: determine token end as next token- start in PsiBuilder--	P	R	Class4
871	Ruby test runner: Statistcis can be sort by- "Tests" column--	A	R	Class4
872	diff: allow to highlight changes without border--	A	R	Class4
873	Live templates are not accessible in- read-only file (e.g. versioned in Perforce or TFS)--	C	A	Class3
874	fixed Project Interpreters: Create- virtualenv from settings doesn't update warnigns about python package- management tools--	C	A	Class3
875	report expressions like "!b != c" in "Double- negation" inspection and add test--	A	A	Class3
876	correctly-sized icon in completion extender--	C	A	Class4
877	Check VFS sanity action--	P	R	Class4
878	code-dups cleanup--	P	A	Class4
879	external system: add clickable link to log- folder to the project import failure message--	A	A	Class2
880	Preserve formatting of converted- collection literals--	C	A	Class4
881	FrameWrapper: do not restore frame state as- iconified	C	A	Class2
882	added additional shortcut--	A	A	Class2
883	optimization: cache org.junit.Test--	P	A	Class3
884	PY-996--	A	R	Class4
885	idiotic "...please recompile"- error message killed--	C	A	Class1
886	editorPaintStart useless in our case--	P	A	Class3
887	resolve and completion for Django settings-	C	A	Class4
888	Fixed typos in test.--	P	A	Class3
889	SMTestRunner: Statistics tab, total column- caption improved--	P	A	Class3
890	GitCheckoutOperation: sleep a bit to- let file watcher report all changes for small repositories where refresh is- too fast.--	C	A	Class3
891	ChangeUtil-encode/decodeInformation for groovy--	A	R	Class4
892	fix navbar rebuild on popup invocation--	C	A	Class2
893	method return fix should not touch super method- formal parameters--	C	A	Class3
894	Maven: test fixed by removing unnecessary and- obsolete assertion--	C	A	Class2
895	one more test that fails; some more code moved- to common framework--	P	A	Class2
896	bad linking of Xerces messages--	C	A	Class2
897	[vcs-log] make BekLinearGraph testable--	P	A	Class3
898	Cannot drag around label with empty- text--	C	A	Class3
899	plugins: tooltip for plugins with newer version- (IDEA-75998)--	A	R	Class4
900	XML rename dialog doesn't accept character '.'- or '-'	C	A	Class4
901	JUnit UI redesign, part 4: "rerun failed tests"- button moved to proper place--	C	A	Class1
902	remember committed changes splitter proportions-	A	A	Class4
903	Major changes in data structures.- Reimplementation & beautification.--	P	A	Class2
904	Fixed ipnb editor layout.--	C	R	Class4
905	Cheaper ProgressManager.checkCanceled().- Mostly, it's call to abstract method eliminated.--	P	R	Class4
906	Improved align behavior to align only- subsequent assignments or hashes--	P	R	Class4
907	preferred focused component	C	A	Class4
908	class kind calculation may produce INRE	C	A	Class4
909	javadoc--	P	R	Class4
910	Gradle: New Module Wizard: "Select- Gradle Projec"t dialog: selection is not confirmed by double-clicking or- pressing Enter--	C	A	Class3
911	NPE--	C	R	Class4
912	Cleanup code--	P	R	Class4
913	Maven: escaping support in the resource- compiler	C	A	Class4
914	form scope provider & dom lookups implemented--	A	R	Class4
915	EP for upsource added--	A	R	Class4
916	New Welcome Screen for CLion--	A	A	Class2
917	support for forced compilation of a set of- files/modules--	A	A	Class4
918	added "Overloaded varargs method" inspection--	A	R	Class4
919	support regular- expressions in branch filter--	A	A	Class4
920	add support for search controls with- history popups--	A	A	Class2
921	IDEADEV-11483 IE conditional comments support- [in progress]--	A	R	Class4
922	symlink support in vfs & SOE protection--	A	R	Class4
923	TestRM, TestRMRestart,- TestClientToAMTokens should run with both CS and FS.	P	R	Class4
924	HDFS-2465. Add HDFS support for fadvise readahead- and drop-behind. Contributed by Todd Lipcon.	A	R	Class4
925	ZKRMStateStore.ZKAction-runWithRetries- doesn't log the exception it encounters.	P	A	Class1
926	Replace major parts of- ApplicationSubmissionContext with a ContainerLaunchContext	P	R	Class4
927	Fixed Log CLI and Web UI for showing- aggregated logs of LRS. Contributed Xuan Gong.	C	A	Class1
928	In FairScheduler.attemptScheduling, we- don't count containers as assigned if they have 0 memory but non-zero cores-	C	A	Class4
929	YARN-3587. Fix the javadoc of- DelegationTokenSecretManager in yarn, etc. projects. Contributed by Gabor- Liptak. (cherry picked from commit 7e543c27fa2881aa65967be384a6203bd5b2304f)--	P	R	Class4
930	NodeManager should handle- disk-failures (Ravi Gummadi via mahadev) - Merging r1208131 from trunk.	A	R	Class4
931	Fixed a problem that DistributedShell AM- may hang if restarted.	C	A	Class3
932	Augmented Hadoop common winutils to have- the ability to create containers as domain users. -	A	A	Class4
933	Use JUnit Rule to optionally fail test- cases that run more than 10 seconds.	P	A	Class3
934	MAPREDUCE-3345. Fixed a race condition in- ResourceManager that was causing TestContainerManagerSecurity to fail- sometimes.	C	R	Class4
935	Changed ContainerManager api to throw- IOException and YarnRemoteException.	P	A	Class1
936	Add backwords compatible- ContainerId.newInstance constructor.	A	A	Class4
937	IOUtils.readFully and- IOUtils.skipFully have typo in exception creation's message.	P	A	Class4
938	Add a caching layer to- Configuration::getClassByName to alleviate a performance regression- introduced in a compatibility layer.	C	A	Class1
939	Merge r1503933 from trunk to branch-2 for YARN-513.- Create common proxy client for communicating with RM	A	R	Class4
940	YARN-1757. NM Recovery. Auxiliary service support.- (Jason Lowe via kasha)	A	R	Class4
941	HADOOP-7223. FileContext createFlag combinations- are not clearly defined. Contributed by Suresh Srinivas.	P	R	Class4
942	Merge -c 1529538 from trunk to branch-2 to fix- YARN-1090. Fixed CS UI to better reflect applications as non-schedulable and- not as pending.	C	A	Class2
943	RMAppAttemptImpl should return the- DummyApplicationResourceUsageReport for all invalid accesses.	P	R	Class4
944	YARN-3583. Support of NodeLabel object instead of- plain String in YarnClient side. (Sunil G via wangda)--(cherry picked from commit 563eb1ad2ae848a23bbbf32ebfaf107e8fa14e87)-(cherry picked from commit b0d22b0c606fad6b4ab5443c0aed07c829b46726)-	P	R	Class4
945	Fix options parsing in CommandFormat.	C	A	Class3
946	Fixed a race condition in TestAMRMTokens- that causes the test to fail more often on Windows.	C	A	Class1
947	TestRMAdminService fails due to- inconsistent entries in UserGroups	C	A	Class2
948	merge YARN-360 from trunk. Allow apps to- concurrently register tokens for renewal.	A	A	Class2
949	Fixed FileSystemRMStateStore to not- leave partial files that prevent subsequent ResourceManager recovery.	C	A	Class3
950	Fixed missing data in localityTable and- ResourceRequests table in RM WebUI.	C	A	Class2
951	Add TestPath tests to cover dot, dot- dot, and slash normalization.	P	A	Class3
952	Removes Access Token implementation- from common.	P	R	Class4
953	Addressed memory leak of LocalResource- objects NM when a resource localization fails.	C	A	Class1
954	Better syntax for replaceLabelsOnNode in- RMAdmin CLI.	P	A	Class3
955	Merge r1580077 from trunk. YARN-1849. Fixed NPE in- ResourceTrackerService-registerNodeManager for UAM.	C	R	Class4
956	Fixed NM to set secure permissions- for files and directories in distributed-cache.	C	A	Class1
957	Update fair scheduler web UI for- hierarchical queues.	A	A	Class2
958	YARN-2730. DefaultContainerExecutor runs only one- localizer at a time.	C	R	Class4
959	YARN-2122. In AllocationFileLoaderService, the- reloadThread should be created in init() and started in start().	C	R	Class4
960	Trim whitespace from directory lists- initializing LocalDirAllocator.	A	A	Class2
961	Merge r1606407 from trunk. YARN-614. Changed- ResourceManager to not count disk failure, node loss and RM restart towards- app failures.	A	A	Class1
962	NetUtils:normalizeHostName does not- process hostnames starting with [a-f] correctly.	C	A	Class1
963	Reset timer for liveness monitors after- RM recovery.	C	A	Class2
964	HADOOP-6139. Fix the FsShell help messages for rm- and rmr.	C	R	Class4
965	Fixed YarnClient to populate the renewer- correctly for Timeline delegation tokens.	C	A	Class3
966	Remove external links from YARN UI.-	C	A	Class4
967	. Added admin ACLs support to Timeline- Server.	A	A	Class1
968	HADOOP-6906. FileContext copy() utility doesn't- work with recursive copying of directories.	C	R	Class4
969	MAPREDUCE-2784. [Gridmix] Bug fixes in- ExecutionSummarizer and ResourceUsageMatcher.	C	R	Class4
970	Hadoop JSP pages don't work under a- security manager-	C	A	Class1
971	Distinct minicluster services (e.g.- NN and JT) overwrite each other's service policies.	C	A	Class4
972	YARN-2819. NPE in ATS Timeline Domains when- upgrading from 2.4 to 2.6.	C	R	Class4
973	Use scheduling policies throughout the- queue hierarchy to decide which containers to preempt	C	A	Class3
974	Namenode start (init) fails because- of invalid kerberos key, even when security set to simple	C	A	Class3
975	Fix comment and remove accidental- println	P	A	Class4
976	YARN-1635. Implemented a Leveldb based- ApplicationTimelineStore.	A	R	Class4
977	In TestDFSShell, use TEST_ROOT_DIR and- fix some deprecated warnings	P	A	Class3
978	Fixed bugs in ResourceManager node-label- manager that were causing test-failures: added a dummy in-memory- labels-manager.	C	A	Class2
979	Disable High-Ram emulation in- system tests.	C	A	Class2
980	FairScheduler: Potential deadlocks in- loading alloc files and clock access.	C	A	Class1
981	YARN-3108. ApplicationHistoryServer doesn't process- -D arguments	C	R	Class4
982	Fix findbugs warnings in- RamDiskReplicaTracker.	P	A	Class2
983	HADOOP-7110. Implement chmod with JNI. Contributed- by Todd Lipcon	A	R	Class4
984	Fix socket leak in GangliaContext.	C	A	Class2
985	YARN-2502. Changed DistributedShell to support node- labels.	A	R	Class4
986	Fix TestDFSRollback to avoid spurious- failures.	C	A	Class3
987	HDFS-73. DFSOutputStream does not close all the- sockets.	C	R	Class4
988	Configuration changes can occur via- the Reconfigurable interface.	A	A	Class3
989	Small cleanup in SchedulerApp.	P	A	Class4
990	Fixed test failures in- applicationhistoryservice.	C	A	Class3
991	YARN-3457. NPE when NodeManager.serviceInit fails- and stopRecoveryStore called.	C	R	Class4
992	Fix a couple isTerminals in Fair- Scheduler queue placement rules	C	A	Class3
993	Protect web ui from cross site- scripting attacks (XSS) on the host http header and using encoded utf-7.-	C	A	Class1
994	HDFS-3167. CLI-based driver for MiniDFSCluster.-	A	R	Class4
995	Reporter sends progress during- sort/merge.	C	A	Class3
996	With Fair Scheduler, cluster can logjam- when all resources are consumed by AMs	C	R	Class4
997	CapacityScheduler side changes to- support non-exclusive node labels.	A	R	Class4
998	svn merge -c 1371390 FIXES: YARN-14. Symlinks to- peer distributed cache files no longer work	C	A	Class1
999	AM cannot create new containers after- restart	C	A	Class2
1000	Add protocol for schedulers to request-	A	A	Class4
1001	Made RMStateStore not update the last- sequence number when updating the delegation token.	C	A	Class1
1002	Added additional unit- tests.	P	A	Class3
1003	HADOOP-7657. Add support for LZ4 compression.-	A	R	Class4
1004	TestContainerManagerSecurity should init- and start Yarn cluster in setup instead of individual methods.	P	R	Class4
1005	Fixed ResourceManager to update the- configurations when it transits from standby to active mode so as to- assimilate any changes that happened while it was in standby mode.-	C	A	Class2
1006	Merge r1601491 from trunk. Augmented- RMStateStore with state machine.	P	R	Class4
1007	Added security support for the Timeline- Client.	A	A	Class1
1008	svn merge -c 1420232 FIXES: . RM and JHS- Web UIs are blank because AppsBlock is not escaping string properly.-	C	A	Class1
1009	Sync documentation for FsShell du with- its implementation.	P	A	Class3
1010	RM does not reject app submission with- invalid tokens	C	A	Class2
1011	Make HttpFS username pattern- configurable	A	A	Class2
1012	FairScheduler: Fix up outdated findbugs- issues.	P	A	Class3
1013	Merge -c 1235858 from trunk to branch-0.23 to fix- MAPREDUCE-3683. Fixed maxCapacity of queues to be product of parent- maxCapacities	C	R	Class4
1014	Fixed NM to use SecureIOUtils for reading- and aggregating logs.	P	R	Class4
1015	All replicas of a block can end up on- the same rack when some datanodes are decommissioning.	C	A	Class1
1016	Distinguish shutdown during supervision- vs. shutdown for rolling upgrade.	P	A	Class3
1017	MAPREDUCE-3392. Fixed Cluster's- getDelegationToken's API to return null when there isn't a supported token.	C	R	Class4
1018	Credential Provider related unit tests- failed on Windows.	C	A	Class1
1019	YARN-295. Fixed a race condition in ResourceManager- RMAppAttempt state machine.	C	R	Class4
1020	Captures authentication and- authorization metrics.	A	A	Class1
1021	svn merge -c 1379565 FIXES: YARN-66. aggregated- logs permissions not set properly	C	A	Class1
1022	Fixed- TestFileSystemApplicationHistoryStore failure on windows.	C	A	Class1
1023	Fix NodeLabelsManager to properly handle- node label modifications when distributed node label configuration enabled	C	A	Class3
1024	Additional instrumentation for- NameNode and RPC server. Add support for accessing instrumentation statistics- via JMX.	A	A	Class3
1025	Implement a fast, pure Java CRC32- calculator which outperforms java.util.zip.CRC32.	A	A	Class2
1026	Added node-labels page on RM web UI	A	A	Class4
1027	Added security support for the Timeline- Client.	A	A	Class1
1028	Cleanup FsShell and prevent masking of- RTE stack traces.	P	A	Class4
1029	YARN-3100. Made YARN authorization pluggable.- Contributed by Jian He.--(cherry picked from commit 23bf6c72071782e3fd5a628e21495d6b974c7a9e)-	A	R	Class4
1030	Improved assertion messages of- TestRMWebServicesAppsModification.	P	A	Class4
1031	LinuxContainerExecutor has a few DEBUG- messages at INFO level	P	A	Class2
1032	YARN-3853. Add docker container runtime support to- LinuxContainterExecutor. Contributed by Sidharta Seethana.--(cherry picked from commit 3e6fce91a471b4a5099de109582e7c6417e8a822)--Conflicts:- hadoop-yarn-project/hadoop-yarn/hadoop-yarn-server/hadoop-yarn-server-nodemanager/src/main/java/org/apache/hadoop/yarn/server/nodemanager/LinuxContainerExecutor.java-	A	R	Class4
1033	YARN-975. Added a file-system implementation for- HistoryStorage.	A	R	Class4
1034	Improved Yarn Registry service record- structure	P	A	Class2
1035	Avoid file system operations in- BPOfferService thread while processing deletes.	P	R	Class4
1036	fixing incremental update of kjars--	C	A	Class2
1037	Added fixes for waltz to run waltz50	C	R	Class4
1038	JBRULES-340 core implementation for 'from' -The- from node is now added -ReteooBuilder is added, but not unit tested.	A	R	Class4
1039	JBRULES-393 Xml dump with illegal characters -fixed- by Javier Prieto	C	R	Class4
1040	DRL-to-RuleModel marshalling- improvements--	P	R	Class4
1041	JBRULES-2339: JBRULES-2440: fixing ruleflow group- management	C	R	Class4
1042	JBRULES-527: adding primitive support to alpha- hashing code	A	R	Class4
1043	moving test to correct test file	P	A	Class3
1044	Property Specific -Added fix for- byPassModifyToLeftTupleSink, which was not working for LIANodes--	C	A	Class3
1045	reuse PomModel if already available--	P	R	Class4
1046	fixed compilation issues, due to incorrect use of- PropagationContextImpl constructor	C	A	Class2
1047	JBRULES-130	C	R	Class4
1048	Removed unncessary else if check; replaced with- else	P	A	Class3
1049	Check the context class-loader of the- current thread before using it--	C	A	Class3
1050	- adding new test for issue related with IF and- pattern ordering, throwing a NotSupportedOperationException--	P	A	Class3
1051	fix queries when used in combination- with agenda-groups--	C	A	Class3
1052	fix ProjectClassLoader when running in- osgi--	C	A	Class3
1053	more test coverage for nesting of OR Ces	P	A	Class2
1054	fixing problem with shadow proxy- cloning for collections	C	A	Class1
1055	refactoring	P	A	Class3
1056	Compiler erroneously resolves the- package of declared classes with the same name as basic classes--	C	A	Class2
1057	fixing multithread bug	C	A	Class1
1058	improve equals/hashCode performances- for all rete nodes--	P	R	Class4
1059	-removed @ignore for passing test, updated to- central test helper methods--	P	A	Class3
1060	properly close InputStreams--	C	A	Class3
1061	fixing problems with collections- clonning and adding unit tests	P	A	Class3
1062	JavaDialect isn't creating unique ids- - fixed name that is checked	C	A	Class1
1063	Guided rule editor does not let the- user to set objects as a parameters for method calls that have objects super- type as a parameter--	C	A	Class2
1064	fixing the problem of multidimentional- arrays	C	A	Class3
1065	[DROOLS-991] allow to configure maxEventsInMemory- in FileLogger--	A	R	Class4
1066	Fixing NPE	C	R	Class4
1067	- fixed an issue where a comment in a work item- definition file results in a null work item definition object, filtering out- null now	C	A	Class2
1068	fix retriving of global entry set from- a Stateless session--	C	A	Class3
1069	fixing compilation problems	C	A	Class3
1070	remove support of deprecated brl files--	P	A	Class4
1071	Changes to resolve issues discovered in integration- tests	C	R	Class4
1072	raise a compilation error when the- same attribute is defined twice on a rule--	A	A	Class3
1073	now works with non DroolsObjectInputStream- serialization.	A	R	Class4
1074	fixed MVEL parser context naming issue.	C	A	Class4
1075	Dynamically generated Types -Must get- classloader from the rulebase root classloader now-	C	A	Class3
1076	format and shorten kproject.xml file--	P	A	Class3
1077	JBRULES-2439	A	R	Class4
1078	Optimised HashMap implementations- -Changed ReteooWorkingMemory modifyObject to do a retract+assert. Its also- now doing the same as Leaps, so we can move the modifyObject method to- AbstractWorkingMemory.	P	R	Class4
1079	avoid useless cleanup of staged- activations in phreak--	P	A	Class2
1080	Make TupleSourceTest work	C	R	Class4
1081	JBRULES-233 for leaps	A	R	Class4
1082	use new Environment constant--	P	A	Class3
1083	Update HumanTask to the new grid inf- and CommandExecutor - fix unsupported setError methods	P	R	Class4
1084	avoid to share a LeftInputAdapterNode- if it has 2 sinks with different property reactive masks--	C	R	Class4
1085	- throw exception if no user transaction was found--	C	A	Class4
1086	- reducing error level to warn to avoid- unnecessary warnings when session id cannot be found--	P	A	Class2
1087	Few fixes to manners	C	R	Class4
1088	Make the KnowledgeAgent Tests more- robust and faster	P	A	Class1
1089	Fixing test	C	A	Class2
1090	fixing problem when inspecting classes- with static initializers	C	A	Class3
1091	fix jitting of constraint with strings- concatenation--	C	A	Class3
1092	[DROOLS-818] register declared listeners on- StatelessKieSession--	C	R	Class4
1093	support for switch over String-- * Eclipse compiler has a least known documented configuration- property "org.eclipse.jdt.core.compiler.compliance" which- needs to be set along with the 'org.eclipse.jdt.core.compiler.source'- and 'org.eclipse.jdt.core.compiler.codegen.targetPlatform' properties.-- * this is going to work only when the underlaying JVM is 7+-	A	A	Class3
1094	Exception: Input stream is not- explicitly closed.	C	A	Class2
1095	workaround bug in JDK 5 concerning- alternatives in lookbehind assertions, using alternatives of lookbehind- assertions rather than a lookbehind assertion with alternatives.--	C	A	Class4
1096	Bugfixes with regards to- concurrency - Changed EnvironmentImpl to use a concurrent HashMap-- The most significant persistence changes are in the JpaPersistenceContextManager class-- Reverted locking changes to the SingleSessionCommandService since a fix for JBPM-3814 is not- possible at the level of the SSCS in the form of locking (because of the app-scoped entity- manager).-- Also deleted unsus…	C	A	Class1
1097	testRemovePackage now works.	C	R	Class4
1098	JBRULES-2537 JSon Marshaller -Added JSon marshaller- using xstream, with unit tests.	A	R	Class4
1099	fix failing tests--	C	A	Class3
1100	Bug in DefaultBetaConstraint class- indexing to never turn on -Fixed DefaultBetaConstraints -Added comprehensive- unit test	C	A	Class2
1101	Decision tables should support timer- column instead of deprecated duration attribute--	A	A	Class2
1102	when returning a cached KieModule from- the KieRepository referring to a snapshot release check if there is a newer- release on the maven repository--	C	A	Class2
1103	JBRULES-85	C	R	Class4
1104	GRE doesn't recognize MVEL inline- lists when opening rule--	C	A	Class3
1105	Thead safe partitioning of- WorkingMemory entry points	P	A	Class1
1106	Added ScannerChangeSetTest which scans CSV resource- file for changes.--	P	A	Class3
1107	fix incremental compilation when updating a- kiemodule without changing the release id (for snaphots)--	C	A	Class2
1108	UI support for 'extends' rule keyword- broken--	C	A	Class1
1109	fixing deadlock on queued actions	C	A	Class2
1110	Activation.remove() is removing the- WRONG activation when used in events -the queue is set to null after dequeue	C	A	Class2
1111	NPE when retracting an object with a- collection field which has been accumulated on--	C	A	Class3
1112	[DROOLS-94] fix BaseObjectClassFieldReader when- reading numeric values--	C	R	Class4
1113	JBRULES-1906: NPE when LiteralRestriction value is- set to null	C	R	Class4
1114	fixing reflection constructor to use int instead of- long for ksessionId--	C	A	Class4
1115	GRE constraint operator list box- problems when re-opening file--	C	A	Class3
1116	fix comparison of 2 timer nodes--	C	A	Class3
1117	update unit tests for LeftInputAdapterNode	P	A	Class3
1118	Fixing legacy API to properly handle- resource configuration.	C	A	Class1
1119	Fix OutOfBoundException on- MemoryFileSystem.existsFile("")--	C	R	Class4
1120	[DROOLS-839] fix LogicTransformer with Accumulate--	C	R	Class4
1121	small fix for rule attributes	C	A	Class4
1122	fix test using using no longer existing- ConsequenceException.getRule() method--	C	A	Class2
1123	fix ObjectTypeNode id creation and- comparison--	C	R	Class4
1124	Make the KnowledgeAgent Tests more- robust and faster - KAgent Event Listener test are enabled again! There- were modified to adopt the new KAgent test architecture--	P	A	Class1
1125	when a dependency cannot be found log- the complete stack trace only in debug mode--	P	R	Class4
1126	really, this is the fix for -15	C	R	Class4
1127	fix jitted contraints when invoking- an interface--	C	A	Class2
1128	Kie-Camel is broken after Camel Update- -Added static field, to allow unit tests to ensure keys are ordered.--	C	A	Class3
1129	fix WELD problem caused by having a beans.xml in- drools-compiler--	C	R	Class4
1130	Support rulebase configuration via- jsr94 registerRuleExecutionSet properties	A	A	Class2
1131	Fixed bug with "disconnected" factHandles- (JBRULES-3187) and added a test to verify that I fixed the bug!!--	C	A	Class3
1132	fix jitting of comparison contraints	C	A	Class2
1133	JBRULES-2934 Add NewRegisterWorkItemHandlerCommand- to CommandFactory with unit test--	A	R	Class4
1134	JBRULES-527: adding primitive support for hashcode- calculation on indexing	A	R	Class4
1135	detect circular dependencies for- declared types--	C	A	Class4
1136	refactor GAV to ReleaseId--	P	R	Class4
1137	Add capability to configure- date-effective/date-expires for SpreadSheet--	A	A	Class2
1138	JBRULES-313: adding fire limit option	A	R	Class4
1139	JBRULES-1641: ForEach node - initial core- implementation of a for each node JBRULES-1551: Workflow human tasks - human- task node with swimlane integration	A	R	Class4
1140	Add support for other data types when- writing processes to XML - pluggable data types support	A	A	Class1
1141	Added Analysis Result as HTML	A	R	Class4
1142	add support for maven version ranges--	A	R	Class4
1143	JBRULES-313: adding halt command	A	R	Class4
1144	allow to specify an optional Environment when- creating a new KieSession--	A	R	Class4
1145	Support for dynamic typing (aka- "traits")--	A	A	Class2
1146	Implementing support to incremental updates on- kcontainers--	A	R	Class4
1147	adding primitive support to indexing	A	R	Class4
1148	[DROOLS-389] Improve support for @Traitable POJOs- and @Trait interfaces--	A	R	Class4
1149	[DROOLS-114] Support Defeasible rules--	A	R	Class4
1150	move test output to one level down--for ReadClassDataTest and CompileJavaAgainstKotlinTest-	P	A	Class3
1151	Introduce RenderingContext and add as parameter- to DiagnosticParameterRenderer-render--RenderingContext holds data about the whole diagnostics allowing to adjust rendering of its parameters-	A	A	Class3
1152	Extracted error messages from- DefaultDiagnosticRenderer to special DefaultErrorMessages class.--	P	R	Class4
1153	Merge two JetTypeMapper-mapToCallableMethod- methods--	P	R	Class4
1154	Base class for multi-file tests extracted--	P	A	Class3
1155	Fixed KT-1797 No completion for nested class name- in extension function definition	C	A	Class3
1156	Extract Function: Make member/top-level function- private by default--	C	A	Class3
1157	Type annotations supported in Java elements--Reflection-related implementations are pending-	A	A	Class4
1158	Fix for the code to compile--	C	A	Class1
1159	fix tests after recent refactoring--	C	A	Class2
1160	Optimize search of package part files for- JetPositionManager--	P	R	Class4
1161	Avoid wrapping AssertionError over and over- again	C	A	Class1
1162	Refactoring: TypeInfoFactory.createTypeInfo()- without type -> noTypeInfo(), getNotNullType -> getTypeNotNull, nullability- refined, style fixes--	P	A	Class3
1163	JS: fix rhino 64k issue--	C	R	Class4
1164	Test data paths fixed--	C	A	Class2
1165	Change Signature: Do not fail on unresolved- PsiMethod -	C	R	Class4
1166	Added some new test for java8--	P	A	Class3
1167	Standard library is imported properly rather than- enclosing the user code--	C	A	Class1
1168	add test for private-to-this visibility in traits--	P	A	Class3
1169	Add test for lookups to classifier members--	P	A	Class3
1170	J2K: correct conversion of nested class- references	C	A	Class3
1171	Minor: additional logging when failing to read- file in VirtualFileKotlinClass--	P	R	Class4
1172	Add WITH_RUNTIME and WITH_REFLECT directives to- box tests--Currently all tests in boxWithStdlib/ run with both runtime and reflection-included; eventually they'll be merged into box/ using these directives-	P	A	Class3
1173	Escaping keywords used as identifiers in- DescriptorRenderer.-- -KT-2810 fixed-	C	R	Class4
1174	Constraint incorporation--In a constraint system a new bound is incorporated:-all new constrains that can be derived from it-(and from existing ones) are added-	A	A	Class2
1175	Unused method removed--	P	A	Class4
1176	Drop JetClassObject element and its usages--as class objects are now represented by JetObjectDeclaration element-	P	R	Class4
1177	js enumerable for ecma5--	A	R	Class4
1178	Tests for match--	P	R	Class4
1179	'hasSyntaxErrors' check moved from Diagnostic to- PositioningStrategy--This makes possible to mark diagnostic errors when syntax error are present (by overriding isValid in PositioningStrategy subclasses).-	A	A	Class2
1180	Minor, move boxAgainstJava logic to a separate- test class--	P	A	Class3
1181	Reflection support--	A	A	Class2
1182	Try keyword--	A	R	Class4
1183	Introduce Variable: Forbid extraction from class- initializer (aside of its body)	C	A	Class4
1184	Reporting real source file paths from K2JS- compiler--	C	R	Class4
1185	KT-737 compareTo() intrinsic--	C	R	Class4
1186	Lazy receiver parameter descriptor: to avoid- eager computation of default types--	P	R	Class4
1187	Config refactoring.--	P	A	Class3
1188	Debug output removed--	P	A	Class3
1189	rename JetTypeMapper constants--	P	A	Class4
1190	Split ProtoBuf.Callable to three messages:- constructor, function, property--Serialize both at the moment, will drop the old one after bootstrap-	P	R	Class4
1191	Custom equals operator (includes little patch to- frontend	C	A	Class4
1192	More usages of asKtScope() removed--	P	A	Class3
1193	better root ns--	P	R	Class4
1194	Removed doTest(char), since it was erroneous.--If lookupString and tailText are both null, completionChar is ignored.-	P	R	Class4
1195	Rendering nice unicode arrow for function types- in UI.--	P	R	Class4
1196	Fix for EA-39487--	C	R	Class4
1197	Invert if condition intention - smaller- availability range + refactored--	P	R	Class4
1198	Replaced AddReturnTypeFix with- SpecifyTypeExplicitlyAction for properties.--	P	R	Class4
1199	Refactoring of- AnnotationResolver.resolveAnnotation(s)Arguments--	P	A	Class3
1200	reformat code, optimize imports--	P	A	Class3
1201	WithDeferredResolve removed (it was never used)--	P	A	Class4
1202	Refactored reference provider logic.--	P	A	Class3
1203	wrongly added test removed	P	A	Class3
1204	Prohibit Array<Nothing>--	C	R	Class4
1205	One more test added--	P	A	Class3
1206	Minor, make ModuleDescriptor public in injectors--It's much more convenient to call injector.getModule() than-injector.getResolveSession().getModuleDescriptor()-	P	R	Class4
1207	rename--	P	A	Class4
1208	abstract + data and sealed + data are also- deprecated--	P	R	Class4
1209	Cleanup--	P	R	Class4
1210	Fixed highlighting for enum and object names in- code--	C	A	Class4
1211	Add support for simple nested classes--	A	A	Class3
1212	Remove unused method--	P	A	Class4
1213	Exception fix: diagnose an error for a generic- type which is a subtype of itself, a set of tests -	C	A	Class2
1214	Initial implementation of KT-6427 Completion to- use Java name suggestion to complete function parameters (+ filtered out- synthetic Kotlin classes from completion)--	A	A	Class4
1215	Auto import offers private static Java- classes	C	A	Class3
1216	reimplemented extension literal definition and- calls to comply with jquery conventions--	P	R	Class4
1217	Extract Function: Fix signature update on dialog- opening--	C	A	Class3
1218	do not mark error type if the expression is- resolved to namespace (EXPRESSION_EXPECTED_NAMESPACE_FOUND error)--	C	R	Class4
1219	Show warning on usages of javaClass<T>() in- annotations loaded from Java--	A	A	Class2
1220	tuple literals--	A	R	Class4
1221	Fix breakpoints in inline functions in libraries--	C	A	Class3
1222	Fixed EA-70945--	C	R	Class4
1223	Fix for KT-9897: Cannot pop operand off an empty- stack" with -= on ArrayList element-- -KT-9897 Fixed-	C	R	Class4
1224	KT-8968 Special completion after "super."-- -KT-8968 Fixed-	C	R	Class4
1225	Base class for surrounders for statements--	P	R	Class4
1226	refactoring--	P	R	Class3
1227	Constructor body generation extracted as a method- (+ migrated to Printer for convenience)--	P	R	Class4
1228	Control-Flow Analysis: Fix bug in finally-block- repetition in the presence of non-local returns	C	A	Class2
1229	Decompiler: Introduce DeserializerForDecompiler--Component which can "resolve" descriptors without project-It builds dummy descriptors for dependencies which are enough to build decompiled text-	A	A	Class3
1230	Support for checking loaded descriptors agains an- expected txt file--	A	A	Class3
1231	compare all overloads including- varargs in a single pass.--	C	R	Class4
1232	Formatting--	P	A	Class4
1233	Abstract Lazy test for gianostics--	P	A	Class3
1234	Method cache for ClassDescriptorSerializer--	P	R	Class4
1235	Minor refactor--	P	A	Class3
1236	Extract Function: Consider reference "broken" if- corresponding diagnostics are changed after code fragment extraction	C	A	Class1
1237	Supported propagation for subclass of- j.u.Collection and similar classes.--	A	R	Class4
1238	Create from usage: Create constructor parameter- by reference in delegation specifier -KT-6601 Fixed--	A	R	Class4
1239	Removed unused methods from KtScope.--	P	A	Class4
1240	Introduce Variable: Support extraction of string- template fragments	A	A	Class4
1241	Implemented better rendering for parameters with- default values in decompiler and descriptor renderer.	P	R	Class4
1242	KT-3639 Can't find sources of AbstractIterator- when navigating from stack strace-- - fixed-	C	R	Class4
1243	Deprecate and don't write KotlinClass$Kind, to be- removed later--	P	R	Class4
1244	Smart completion: code improvements and- refactorings after code review--	P	A	Class3
1245	Lazy resolve: Package-level objects are handled- properly--	C	R	Class4
1246	Get rid of obsolete syntax in quickfixes changing- lambda's signature--- Do not wrap parameters with '()'-- Do not set return type for them-- Fix existing testData-	P	A	Class3
1247	refactored generation of static initializer--	P	A	Class3
1248	fix KT-9299 In a project with circular- dependencies between modules, IDE reports error on use of internal class from- another module, but the corresponding code still compiles and runs.	C	A	Class2
1249	Fix header scope for secondary constructors--Add companion object's scope and nested classes-	C	A	Class2
1250	Prevent lazy types to be accidentally computed in- debug--	C	A	Class3
1251	- Adjusted build.properties so that default values- work directly. - Refactored the usage of parameter lists by using a new- ParameterList (implementing List<Parameter>) and adding helper methods. -- Form now derives from ParameterList. - ConnectorCall.getRequestHeaders() and- getResponseHeaders() now return a ParameterList, other helper methods- removed. - Added urlEncode() on Parameter. - Refer…	P	R	Class4
1252	- Renamed the "org.restlet.ssl.hostnameVerifier"- attribute into just "hostnameVerifier" for consistency with existing naming.--	P	A	Class4
1253	Fixed "not found" status for Options requests.--	C	A	Class3
1254	- All core representation classes have been moved- from the "org.restlet.resource" package into a new- "org.restlet.representation" package. Make sure to adjust your import- instructions.--	P	R	Class4
1255	Fixed ZipClientHelper test case.--	C	R	Class4
1256	Fixed generation of cache directives in the- cache-control header.--	C	A	Class2
1257	- Refactored the JdbcClient to return XML result- sets (using a new RowSetRepresentation class). In addition, the XML- request can now contain several SQL statements to be executed as a batch	A	A	Class3
1258	- Simple HTTP connector works again--	C	R	Class4
1259	- Cleaned code to remove Eclipse 3.4 warnings and- errors.--	P	A	Class4
1260	- Moved SIP test cases to test module--	P	A	Class3
1261	JAX-RS extension: - added to changes.txt, that I- switched to API 0.11 - fixed a big bug related to the determining of the- MessageBodyWriter - using org.restlet.data.Conditions.getStatus() for- javax.ws.rs.core.Request.evaluatePreconditions() instead of using an own- implementation (the Restlet method has a bug, I'm waiting for the patch to be- applied) - fixed a bug in JaxRsUriBuilder.buildFrom…	C	A	Class2
1262	- Fixed unit test due to random Java method- introspection order--	C	A	Class3
1263	- The Request-isConfidential() method has- been refactored to be supported by Message and Response as well.- The method Request-setConfidential() has been removed (back to- Restlet 1.0 state). Added Protocol-isConfidential() method to- support the new implementation which rely on Request-getProtocol().-	P	R	Class4
1264	- Renamed DirectoryResource into- DirectoryServerResource to match its new super class name.--	P	A	Class4
1265	Fix issue -853--DefaultSslContextFactory would ignore enabledCipherSuites unless you also specified enabledProtocols, due to a copy-paste error.-	C	A	Class1
1266	- Upgraded Simple server to version 4.1.2.- Contributed by Niall Gallagher.--	P	A	Class1
1267	Fixed regression. Reported by Guido Schmidt--	C	R	Class4
1268	- Fixed NIO client blocking due to reuse attempt- of a busy connection--	C	A	Class1
1269	- Added Metadate-getParent() method. - Added- better Variant-toString() implementation.--	P	R	Class4
1270	JAX-RS extension continued: - Added an- ObjectFactory to the JAX-RS extension for customized root resource class and- provider instantiation. Contributed by Bruno Dumon.--	A	R	Class4
1271	- More optimizations for internal connectors.--	P	A	Class3
1272	Fixed bug--	C	A	Class2
1273	- When updating a file via the FILE- connector, some deletion issue could occur on Windows due to JVM- integration issues with the OS. A workaround to reduce this was to- invoke the garbage collection.	C	A	Class1
1274	- Continued SIP transaction support--	A	R	Class4
1275	- Fixed connection closing regression--	C	A	Class1
1276	Removed Representation-getDigester* methods. There- is no reason to favor this way to wrap a Representation.--	P	R	Class4
1277	- Initial code for enhanced internal HTTP- connectors.--	P	A	Class3
1278	Fixed bug in DomRepresentation causing the loss of- both public and system DocType.	C	A	Class2
1279	- Initial code for new default HTTP connector and- SIP connector.--	A	R	Class4
1280	Fixed content negotiation issue in the servlet- extension.--	C	A	Class3
1281	- Continued NIO connector--	A	R	Class4
1282	Compute logged duration only if needed.--	P	R	Class4
1283	Added support of the Authentication-Info header.--	A	A	Class1
1284	- Fixed bugs--	C	A	Class2
1285	- Renamed Representation-write(Appendable) to- append(Appendable).--	P	A	Class4
1286	- Fixed issue with HTTP client connector not- correctly reporting connection and other IO errors.--	C	A	Class2
1287	Fixed javadocs.--	P	A	Class3
1288	Added support of the dataservices extension in- Android.--	A	A	Class2
1289	- Refactored WADL extension based on John- Logsdon feed-back. Add convenience methods and constructors on- MethodInfo and RepresentationInfo. Removed unecessary methods on - WadlResource like getRepresentationInfo(Variant) and - getParametersInfo(RequestInfo|ResponseInfo|Representation- Info).--	P	A	Class3
1290	JAX-RS-Extension: - added javadoc to util methods.--	P	A	Class3
1291	JAX-RS extension - Issue 800 (an NPE): I've checked- all methods with the name, and all possible points for NPE should be defanged- now--	C	R	Class4
1292	- Updated Jetty to version 6.1.15--	P	R	Class4
1293	- Fixed issues in Grizzly code.--	C	A	Class2
1294	- Fixed bug causing unit tests to fail--	C	A	Class3
1295	Added parsing of RDF XML.--	A	R	Class4
1296	JAX-RS-Extension: - encoding of UriBuilder- parameters implemented--	A	R	Class4
1297	- Bumped versions to 1.0 RC3 - Updated docs -- Removed deprecated methods--	P	A	Class4
1298	- Minor refactoring in RDF extension.--	P	A	Class3
1299	Added support of Ranges.--	A	R	Class4
1300	- Disabled failing test cases (temp)--	C	A	Class3
1301	- The ServletContextAdapter passed by the- ServerServlet to the Restlet's Application was not given to the- constructor but via the setContext() method. Reported by Tammy Croteau.--	C	R	Class4
1302	- Initial code for new default HTTP connector and- SIP connector.--	A	R	Class4
1303	- Reference now verifies the validity of- characters before setting them.	A	A	Class4
1304	Add SpringRouter-style supplemental direct routing- via the attachments property. This allows for multiple routes for the same- bean or routes which would be illegal/unmatched as bean names.--	A	A	Class3
1305	Add support for template route matching mode--	A	R	Class4
1306	- Improved exception handling on createResource().--	P	A	Class2
1307	Fixed potential NPE when the product name is null.	C	A	Class2
1308	Removed debug traces.--	P	R	Class4
1309	- Deprecated ServletConverter and added an- equivalent ServletAdapter class to prevent confusion with the - ConverterService reintroduced in Restlet 1.2. - Added root Helper class.--	P	R	Class4
1310	JAX-RS extension continued: - @FormParam is now- supported--	A	R	Class4
1311	- The simplified logging formatter (one line)- is now available only in the Java SE edition as it could cause- troubles with Java EE container and potentially GAE/Android as we- reconfigure the default log manager programmatically.	C	R	Class4
1312	- Fixed plugin descriptors for some extensions.--	C	A	Class4
1313	Fixed code generation for the GAE edition.--	C	R	Class4
1314	Completed implementation of apispark extension.--	A	R	Class4
1315	- Some unit test were catching exceptions,- preventing JUnit from failing the tests.--	C	A	Class3
1316	- Initial code for new default HTTP connector and- SIP connector.--	A	R	Class4
1317	- Initial code for new default HTTP connector.--	A	R	Class4
1318	- Fixed HTTPS issues in internal connector.--	C	A	Class3
1319	Removed unnecessary instruction.--	P	A	Class4
1320	- Fixed filling state bug in Buffer class -- Removed received inbound message from messages queue when fully received -- Connection closing seems to work again - CouchDBUpload test working again--	C	A	Class1
1321	Fixed internal client connector.--	C	A	Class3
1322	Fixed test case.--	C	A	Class3
1323	Add comments describing methods (from HTTP, Webdav- RFC).--	P	A	Class4
1324	- The CLAP connector didn't set the- expiration date based on its 'timeToLive' parameter.	C	A	Class2
1325	Introducing a new Directory constructor with a- LocalReference instance.--	A	A	Class3
1326	Allowed custom parsing of Atom documents.--	A	A	Class4
1327	Fixed issue -649, if needed, add base64 padding- characters to encoded md5 hash before decoding. Reported and contributed by- Andy Dennie.--	C	R	Class4
1328	- Initial code for new default HTTP connector and- SIP connector.--	A	R	Class4
1329	Indexed directories were not properly handled with- the CLAP protocol.	C	A	Class3
1330	Fixed potential infinite loops while reading- headers	C	A	Class2
1331	- Fixed potential NPE in ReferenceList--	C	R	Class4
1332	- Continued SIP transaction support--	A	R	Class4
1333	- Continued support for non-blocking HTTPS to the- internal NIO connectors, client-side and server-side.--	A	A	Class1
1334	Fixed NPE in the dataservices extension due to bad- parsing of referential constraints.--	C	A	Class3
1335	prevented primitive type from being returned as- models in API Declarations	C	A	Class4
1336	EvaluatePrecondition* to Request* renamed--	P	R	Class4
1337	- Updated Jetty to version 7.0 RC4.- Upgraded the Jetty extension: replaced "headerBufferSize" parameter- by "requestHeaderSize" and "responseHeaderSize" parameters. - Removed "lowThreads" parameter no longer available.--	P	R	Class4
1338	- Fixed latest issues. Submitted by Thierry- Boileau.--	C	R	Class4
1339	1.0 beta 9 (not released yet) - Merged Restlet and- UniformInterface interfaces into a single Restlet interface for- simplification purpose. - Moved connectors handling from OriginServer upto- Component as other components like Proxies need them. - Renamed UniformCall- and related methods into RestletCall. - Renamed RestletCall.getHandler*()- methods into getRestlet*(). - Updated Jetty 6 to versi…	P	R	Class4
1340	- Additional WADL refactorings.--	P	A	Class3
1341	Fixed potential NPE.--	C	R	Class4
1342	Added warning message when no client connector- supports the request's protocol.--	P	A	Class2
1343	Fixed range issue -607.--	C	R	Class4
1344	- Fixed bug in XstreamRepresentation- failing to use the DOM XML driver.	C	A	Class2
1345	Fixed issue 210 : a Language tag is composed of a- list of subtags--	C	A	Class3
1346	Updated Ranges test case.--	P	A	Class3
1347	ServerResource now supports empty POST and PUT- requests.--	A	R	Class4
1348	- Fixed Message-release() Javadocs.--	P	A	Class3
1349	Updated to Scripturian 1.0RC3--	P	R	Class4
1350	- Fixed selector exhaustion issue with- Grizzly connector.	C	A	Class2
1351	- Fixed error in Conditions.getStatus()- sometimes returning 304 for methods other than HEAD and GET.	C	A	Class1
1352	UPDATE ADD now possible with subdocuments fields--	A	A	Class2
1353	Fixed issue with inner class and Object Database- interface--	C	A	Class3
1354	Huge refactoring on GraphDB: - changed class- names in vertex and edge - Optimized memory consumption by removing nested- records - Optimized speed in ORecord.equals() and hashCode(): now avoid field- checks (experimental)--	P	A	Class1
1355	Fixed bug on oidentifable but not odocument- fetching--	C	A	Class2
1356	Unneeded index flush was removed--	P	A	Class3
1357	fixed collection fields in query results,	C	A	Class2
1358	Patch by Luca Molino about the management of JSON- with document type not only as first attribute--	A	R	Class4
1359	Fixed issue 684 about strict mode--	C	R	Class4
1360	Implemented issue 109 About in-memory clusters- inside regular persistent databases.--	A	A	Class1
1361	Issue 762 was fixed.--	C	R	Class4
1362	DbDeleteTest is made more stable.--	C	A	Class2
1363	Fixed a bug on browsing clusters in transaction- as issue	C	A	Class2
1364	Remote bag. Fix save notification.--	C	A	Class3
1365	Created 2 new test case with creation of vertexes- and edges in not default clusters--	P	A	Class3
1366	Profiler: - all the metrics now have a- description and a type - supported new HTTP REST command /profiler/metadata- to retrieve all the metadata--	A	R	Class4
1367	Fixed issue 156 about deep inheritance--	C	A	Class3
1368	Drop database implemented and tested against- local and remote db--	A	A	Class1
1369	Issue -2900, OFlatDatabase was removed.--	C	R	Class4
1370	Fixed issue on delete when the database is not- yet opened--	C	A	Class3
1371	Support for not-logget Transactions by setting- OTransaction.setUsingLog(false). Default is true, so full compatibility is- guaranteed--	A	A	Class3
1372	Issue -71:- http://code.google.com/p/orient/issues/detail?id=71 Working in progress--	A	R	Class4
1373	Supported new syntax in SQL UPDATE to use a inner- query as target. Example: update ( traverse V.in, E.out from V ) set date =- sysdate() where out.size() > 1--	A	A	Class2
1374	Fixed issue on browsing of entire cluster/class--	C	A	Class3
1375	Fix on marshalling/unmarshalling of- embedded documents--	C	A	Class3
1376	Improved performance by handling begin and end of- offsets in cluster data.--	P	A	Class1
1377	Fixed issue -255 about hooks: wasn't called- during TX - added new test cases - check of recursive call for the same- record in hook.--	C	A	Class3
1378	Removed old code to handle temporary records in- indexes--	P	A	Class3
1379	Fixed issue 1198: NullPointerException in- OCommandExecutorSQLResultsetAbstract.assignTarget--	C	R	Class4
1380	fixes permissions follow role's- inheritance--	C	A	Class1
1381	Fixed bug on database drop in Maven Tests--	C	A	Class2
1382	Renamed threads to a more understandable ones--	P	A	Class4
1383	implementing math operations--	A	R	Class4
1384	Cleanup inspection warnings--	P	A	Class4
1385	Improved automatic backup management of errors--	P	A	Class2
1386	Fixed issue 800 closing the socket on timeout--	C	A	Class3
1387	Fixed problem with remote connection to- distributed storage--	C	A	Class3
1388	GraphDB: supported 3 locking modes: no locking,- database level locking (default) and record level locking--	A	A	Class1
1389	Fixed bug on management of indexes with the- introducing of new ODistributedStorage--	C	A	Class2
1390	Fixed issue -1521 about JSON management of- embedded lists with different types--	C	A	Class3
1391	Console: fixed jdk6 problem in more elegant way	P	A	Class3
1392	removed not useful system out from test cases.--	P	A	Class4
1393	Minor: fixed javadoc, put a variable as final,- managed no return in OPLA/execute block--	P	A	Class2
1394	implemented integration of globla property with- binary serialization--	A	A	Class3
1395	Fixed some errors in remote calls.--	C	A	Class1
1396	fixed bug on shutdown--	C	A	Class2
1397	Started support for server-side triggers--	A	A	Class3
1398	Fixed problem of ConcurrentModificationException, the problem should be due to a wrong isolation on Map in- cache: used exclusive lock even for keys() and get().--	C	A	Class1
1399	Changed syntax for "create class" command. Now- wants the keyword "CLUSTER" and also accepts cluster names--	A	R	Class4
1400	Renamed everywhere OTreeMap in OMVRBTree as the- new name of the algorithm: OMVRBTree--	P	A	Class3
1401	Fixed issue 110 about HTTP/REST invocation of- "command" parameter passing a SELECT statement--	C	A	Class3
1402	Further work or traverse: - supported new- OSQLPredicate to specify a predicate using SQL language--	A	R	Class4
1403	Minor: fix warning--	P	A	Class3
1404	Huge refactoring on GraphDB: - changed class- names in vertex and edge - Optimized memory consumption by removing nested- records - Optimized speed in ORecord.equals() and hashCode(): now avoid field- checks (experimental)--	P	A	Class1
1405	fixed minor issue with thread local management--	C	A	Class3
1406	Working to fix corrupted data in sockets--	C	A	Class3
1407	Minor optimization in RidBag--	P	A	Class3
1408	Changed log level to debug--	P	A	Class3
1409	Removed checks if db is open as a bug reported in- the ML	C	A	Class2
1410	Improved memory usage and optimized general speed--	P	A	Class1
1411	Fixed bugs on index where internal records were- not deleted--	C	A	Class2
1412	Fixed issue on empty links--	C	A	Class4
1413	supported invocation of Java static methods--	A	A	Class3
1414	Fixed issues with sharing. Added also first test- case on sharding--	C	A	Class3
1415	last attempt of fixing test failing on ci.--	C	A	Class3
1416	Distributed: fixed issue -2008 on deploying- database--	C	A	Class3
1417	Fixed a bug in concurrency: - adaptive lock can- be configured by OGlobalConfiguration - Created new- OGlobalConfiguration.ENVIRONMENT_CONCURRENT for this purpose -- OSharedResourceAdaptiveLinked class has no sense to exists anymore: removed -- segments don't lock the storage anymore but has own lock. This could be- removed but it will tested for a while - update and delete record operations- loc…	C	R	Class4
1418	Fixed issue about out*() functions--	C	R	Class4
1419	Minor: removed some warnings--	P	A	Class3
1420	Fixed issue -3741--	C	R	Class4
1421	Fixed issue -2472 about null values in Lists--	C	R	Class4
1422	Index in tx: Fixed issue 468 about deletion--	C	R	Class4
1423	Issue -1607 WAL page change tracking was- reimplemented.--	P	R	Class4
1424	Released 0.9.8 with the fix on partitioning in- Key/Value Server--	C	R	Class4
1425	OOM reported by NMSWorks was fixed.--	C	R	Class4
1426	Issue -1404 Write cache speed improvements.--	A	A	Class1
1427	Fixed issue on set password for OUser.--	C	A	Class1
1428	Issue 161: added the support for custom strategy- on creation of records-	A	A	Class3
1429	Fixed issue about parenthesis in SQL query, added- one more test to the suite for it--	C	A	Class3
1430	Fixed issue -1445 providing the new TIMEOUT in- most of the commands--	A	A	Class1
1431	Fixed problem with LET and context variables--	C	A	Class3
1432	Implemented new commands: - truncate cluster -- truncate class--	A	A	Class2
1433	Fixed bug using SQL projection against Object- Database interface. Now returns always documents instead of POJOs when the- ODocument has no class associated.--	C	A	Class1
1434	Implemented self-repair in case the security is- broken. This new method in the ODatabaseListener interface will allow to- handle corruptions in better way.--Console now displays a message and after a user input fix it.	A	A	Class1
1435	Fixed issue reported by Steven about TX- congruency with nested records. The bug was reported in rollback.--	C	A	Class3
1436	HTTP static content now supports single file as- configuration--	A	A	Class3
1437	removed nasty warnings in compilation--	P	A	Class1
1438	Improved management of distributed cluster nodes--	P	A	Class3
1439	Improved import/export tools--	P	A	Class3
1440	fixed cluster id selection in distributed mode.--	C	A	Class2
1441	Fix failed WAL test.--	C	A	Class3
1442	Fix by Andrey to get working test cases even on- Linux (Windows seems to eat anything)--	C	A	Class3
1443	Fix by Luca Molino on schema and in-thread db--	C	R	Class4
1444	fix for use of different serializer by the db- compare--	C	A	Class3
1445	Working to fix corrupted data in sockets--	C	A	Class3
1446	Fixed problem with linkeset modified right after- query in remote configuration--	C	A	Class2
1447	Issue -1404 WAL durability test improvements.--	P	A	Class1
1448	first implementation of binary record serializer- debug info.	A	A	Class3
1449	Minor improvement on collection remove--	P	A	Class3
1450	Fix by Luca Molino to close issue 619--	C	R	Class4
1451	Improved auto-recognize of type in JSON reader--	P	A	Class2
1452	Fix blueprints tests and TX NPEs.--	C	A	Class3
1453	Fixed issue on missed saving of the configuration- when Local Data has multiple files.	C	A	Class3
1454	Added new camel-servletlistener- component for bootstrapping Camel in web app without using spring etc. Work- in progress.	A	A	Class2
1455	Minor cleanup	P	R	Class4
1456	camel-josql should have SQL language- META-INF which can be found automatically by camel-core	A	A	Class3
1457	Added more unit tests	P	R	Class3
1458	Upgraded the camel-ibatis to JUnit4	P	A	Class3
1459	Added OSGi integration test for- camel-mail and camel-cxf	P	A	Class3
1460	Added transferExchange option to- camel-jms.	A	A	Class3
1461	Added unit tests based on the mailing list- question	P	A	Class3
1462	CAMEL-2445 applied patch with thanks to Stan and- Jeff--git-svn-id: https://svn.apache.org/repos/asf/camel/trunk@906342 13f79535-47bb-0310-9956-ffa450edef68-	C	R	Class4
1463	Removed a bad tangle in camel spi. Not- this package has no tangles	P	R	Class4
1464	Removed @MessageDriven as its- replaced with @Consume.	P	A	Class3
1465	improved the camel-bam module to handle- concurrent processing better & dealing with JDBC/JPA exceptions if concurrent- updates to the same process occur at the same time; also added more better- tests	P	A	Class2
1466	CAMEL-751 Get the CamelContext ErrorHandler to- work--git-svn-id: https://svn.apache.org/repos/asf/activemq/camel/trunk@679345 13f79535-47bb-0310-9956-ffa450edef68-	C	R	Class4
1467	CAMEL-1198: Ant path matcher now also possible- with camel-ftp.--git-svn-id: https://svn.apache.org/repos/asf/activemq/camel/trunk@730753 13f79535-47bb-0310-9956-ffa450edef68-	A	R	Class4
1468	Sanitiy check route in XML DSL, that- there is input and outputs in routes.	A	A	Class2
1469	Fix test error reported by TeamCity	C	A	Class3
1470	Updaed the mail component so that mail headers- are correctly copied over from message to message. This highlighted the fact- that th TO: should always be what is specified on the outbound endpoint- instead of the To: in the message. Added a test the validates headers are- preserved.	C	A	Class3
1471	Allow to override blueprint config- admin placeholders from unit test.	A	A	Class1
1472	corrected typo.	P	A	Class4
1473	added fix for- https://issues.apache.org/activemq/browse/CAMEL-347 to enable JUEL to invoke- methods in expressions--git-svn-id: https://svn.apache.org/repos/asf/activemq/camel/trunk@631503 13f79535-47bb-0310-9956-ffa450edef68-	A	R	Class4
1474	Added basic operator support for- simple language - end users is confused its not working, and nice to have- core support for basic operators. Added ?method=methodname for the bean- langauge so its in line with the bean component.	A	A	Class1
1475	Added direct-vm component to act as- synchronous direct calls between multiple camel contexts in the same JVM (eg- like direct + vm together). Can be used to support transactions spanning- multiple camel contextes / bundles.	A	A	Class1
1476	Fixed adding routes with quartz- endpoints to already started camel should add jobs to scheduler.	C	A	Class2
1477	CAMEL-1461: JMSProducer only sets JMSReplyTo if- exchange is out capable. Fixed a NPE.--git-svn-id: https://svn.apache.org/repos/asf/camel/trunk@757693 13f79535-47bb-0310-9956-ffa450edef68-	C	R	Class4
1478	Scheduled consumer now log- java.lang.Error at FATAL level before rethrowing	P	R	Class4
1479	clean up the codes for wiki	P	A	Class4
1480	CAMEL-1099: Added FileIdempotentRepositry	A	R	Class4
1481	caching the StreamSource by caching- the inputStream or reader	P	R	Class4
1482	Removed the System.out.print line from RunMojo	P	R	Class4
1483	Fixed test	C	R	Class3
1484	Fix compile error	C	A	Class1
1485	BatchProcessor interrupt has side- effects	C	R	Class4
1486	CAMEL-2919: Debugger API	A	R	Class4
1487	Add ThreadPoolProfileBuilder and- change ThreadPoolFactory to use the ThreadPoolProfile	P	R	Class4
1488	CAMEL-3879 Applied patch of DanK with thanks	P	R	Class4
1489	Adding test for sending back a reply- to JMSReplyTo based on a temporary queue.	P	A	Class3
1490	fixed the spring configuration url- error	C	A	Class1
1491	Fixed tests.	C	R	Class4
1492	Added unit test for mistyped URI	P	A	Class3
1493	MailConsumer and MailProducer now use the- endpoint reference from its super class and doesn'n manager its own instance- variable	P	R	Class4
1494	JmsEndpoint is now singleton.	P	R	Class4
1495	fixed the issue that Validator- component fails on XSD with indirect relative import	C	A	Class3
1496	Polished dataset and timer component.- Added @deprecation to not used method. Removed unused imports.	P	A	Class3
1497	Camel uses same media size names as- Java Printer API. Thanks to Torsten for patch.	P	R	Class4
1498	Set the isCreateCamelContextPerClass on tests- that can pass with it to speed up the tests	P	A	Class3
1499	removed the generics from the Process interface- so that it must take an Exchange parameter to avoid ClassCastException when- sending any old Exchange into an Endpoint<FooExchange>	C	R	Class4
1500	Added another test	P	A	Class3
1501	CAMEL-3788 Merged the patch into camel-http4	C	R	Class4
1502	AdviceWith can now manipulate routes.- This allows you for example to replace parts of routes during testing.	A	A	Class3
1503	further improvements for CAMEL-133, a client can- now create an exchange on an endpoint specifying the ExchangePattern it wants- to use for an Exchange via Endpoint.createExchange(pattern)	A	R	Class4
1504	resource class refactoring; introducing a- reusable base class for sub-resources - also added a new RoutesResource to- simplify the root resource further	P	A	Class3
1505	minor tidy up of test case	P	A	Class3
1506	Created gzip data format	A	A	Class3
1507	Fixed rss component bug with uri- encoding.	C	A	Class1
1508	Added new Sampler EIP. Thanks to- Stephen Gargan for the contribution.	A	R	Class4
1509	Fixed test on other boxes	C	A	Class3
1510	Removed the printStackTrace line in the- CxfWsdlFirstTest	P	A	Class3
1511	added contains() method to the DSL for- .header("foo").contains("cheese") for multi-value headers	A	R	Class4
1512	Http based components should filter- out camel internal headers.	C	A	Class1
1513	CAMEL-1789 Let the Camel Route support to lookup- the service which is exported from the OSGi bundle	A	R	Class4
1514	Properties to Cxf ClientProxyFactory- can be set on endpoint uri or CxfEndpoint bean.	A	A	Class3
1515	Removed the System out from the GenericFile	P	R	Class4
1516	Fixed compiler issue on JDK 1.5	C	A	Class1
1517	Fixed tests using released version.	C	A	Class3
1518	Overhaul of JMX. Added managed send- to.Prepared for camel/route context runtime configuration to be managed.	P	R	Class4
1519	Fix for MulticastStreamCachingTest after- interceptor changes	C	A	Class2
1520	Fixed unit test having problem on Windows- deleting files for cleanup.	C	A	Class3
1521	fixed test case which was failing sometimes on- linux	C	A	Class3
1522	Fixed the issue of IOException: Bad- file descriptor	C	A	Class3
1523	Removed not needed code.	P	A	Class4
1524	Fixed missing classes in .jar - osgi- export stuff	C	A	Class1
1525	Checkstyle	P	A	Class4
1526	clean up the camel OSGi integration- test and load the karaf spring feature first	P	A	Class4
1527	Polish the- CxfRsProducerAddressOverrideTest	P	A	Class3
1528	added explicit generics to avoid possible- compiler wierdness in the DSL like we had yesterday where the compiler- decided to use Object rather than ProcessorType in some DSL expressions	P	A	Class2
1529	added a ServiceStatus property to- most Service implementations - and exposed the status of a route	A	A	Class1
1530	Removed the System.out.println of the test	P	A	Class4
1531	Fixed test on windows	C	A	Class3
1532	JmsProducer supports non blocking- async routing engine for InOut Exchanges (request-reply over JMS).	A	A	Class1
1533	Fixed test on other boxes.	C	A	Class3
1534	Polish the unit test of JmsMessageBindTest	P	A	Class3
1535	Do not use copy of exchange when- processing in doCatch.	P	R	Class4
1536	Camel fails if onCompletion has been mis- configured from Java DSL.	C	A	Class2
1537	CAMEL-2510 Fixed the issue of Mixing jetty/http- in a route screws up the URI used by HttpClient	C	R	Class4
1538	Fix csv test that fails on slower- machines sometimes.	C	A	Class3
1539	fixed the unit test error	C	A	Class3
1540	Fixed unit test. Doh what a mistake	C	A	Class3
1541	Fixed camel-core build error.	C	A	Class2
1542	Fixed tests	C	A	Class3
1543	Fixed fallback to use http4 or http4s- for proxy scheme when configured as property on CamelContext properties.	C	A	Class3
1544	allow the installed languages to be browsed- restfully for CAMEL-1355	A	A	Class1
1545	polished	P	R	Class3
1546	[CAMEL-1289] HeaderFilterStrategy - move from- Component to Endpoint (for JHC component)	P	R	Class4
1547	camel-xmljson fixed issue so- attrbiutes with name type can be serialized.	C	A	Class3
1548	added firedtime property.	A	A	Class3
1549	Overhaul of JMX. Routes can now be- started/stopped.	A	A	Class2
1550	Fix compilation issue on Java 1.5	C	A	Class1
1551	Fix potential NPE.	C	R	Class4
1552	make the ZipDataFormat Stream friendly	P	A	Class3
1553	tidied up some of the default JMS configurations	P	A	Class3
1554	Polished code	P	A	Class3
1555	Added some logs for debuging	P	A	Class3
1556	Fixed test	C	R	Class3
1557	Add a ResourceResolver implementation for WebJars--Prior to this commit, WebJars users needed to use versioned links within-templates for WebJars resources, such as `/jquery/1.2.0/jquery.js`.-This can be rather cumbersome when updating libraries - all references-in templates need to be updated.--One could use version-less links in templates, but needed to add a-specific MVC Handler that uses webj…	A	A	Class1
1558	Add ability to customize message channels--@EnableWebSocketMessageBroker message channel configuration can now be-customized via WebSocketMessageBrokerConfigurer. It is necessary to-make this easy and even required as part of the basic configuration-since by default the message channels are backed by a thread pool of-size 1, not suitable for production use.--Issue: SPR-11023-	A	A	Class2
1559	polishing--	P	R	Class3
1560	MockHttpServletResponse supports multiple- includes (SPR- )--	A	R	Class4
1561	based StandardScriptFactory (including- <lang:std> support)--This commit also completes 4.2 schema variants in spring-context.	A	A	Class4
1562	Adapted getXmlAsSource implementation to avoid- compilation failure in IntelliJ IDEA--	P	R	Class4
1563	@Resource injection points support @Lazy as well--Issue: SPR- -	A	A	Class3
1564	DataBinder tries ConversionService if- PropertyEditor could not produce required type--Issue: SPR-13042-	A	R	Class4
1565	Introduce "dummy" Environment implementation--For testing purposes in which an Environment implementation is required-but a ConfigurableEnvironment is not desirable.--All methods are no-ops and return null, therefore NPEs are likely.-	A	A	Class2
1566	SPR- - Allow XStreamMarshaller subclasses to- customise XStream object--	A	A	Class4
1567	made ConversionExecutor internal; removed other- unused operations from public SPI--	P	A	Class3
1568	javadoc--	P	R	Class4
1569	Only register Date converters with global format--Change JodaTimeFormatterRegistrar and DateFormatterRegistrar to only-register converters for the Date and Calendar types when a global format-has been defined. This means that the ObjectToObject converter will-handle String->Date conversion using the deprecated Date(String)-constructor (as was the case with Spring 3.1).--Issue: SPR- -	C	A	Class4
1570	Polish JavaDoc--	P	A	Class3
1571	added public "validateDatabaseSchema" method to- Hibernate LocalSessionFactoryBean (SPR- )--	A	R	Class4
1572	Polish Javadoc for PropertySource implementations--	P	A	Class3
1573	Introduce Registration style objects,- rename several Spring MVC *Configurer helpers to *Registry, add more tests--	A	A	Class1
1574	ResponseEntity's HeadersBuilder allows for- specifying existing HttpHeaders-	A	A	Class4
1575	SPR-5802 - NullPointerException when using- @CookieValue annotation--	C	R	Class4
1576	New method to return string representation of- typeDescriptor--	A	R	Class4
1577	Polish AbstractHandlerMethodMapping-	P	A	Class3
1578	SPR-7305 -- o.s.http.client.SimpleClientHttpRequestFactory does not allow to specify a- java.net.Proxy--	A	R	Class4
1579	Add timeout async request handling to OSIV- components--This change adds async web request timeout handling to OSIV filters-and interceptors to ensure the session or entity manager is released.-	C	A	Class3
1580	Allow file locations for resource handling--Prior to this change, location checks for serving resources would append-`/` to the location path it didn't already have one.--This commit makes sure not to append a `/` if the provided location is-actually a file.	C	A	Class3
1581	Shutdown Reactor env when relay handler is- stopped--The Reactor Environment (that's used by the TcpClient) manages a-number of threads. To ensure that these threads are cleaned up-Environment.shutdown() must be called when the Environment is no-longer needed.-	C	A	Class2
1582	Allow binary messages in StompSubProtocolHandler	A	A	Class2
1583	DataSourceUtils lets timeout exceptions through- even for setReadOnly calls (revised; SPR-7226)--	C	R	Class4
1584	Polishing--	P	R	Class3
1585	added "boolean isRegisteredWithDestination()"- method (SPR-7065)--	A	R	Class4
1586	getAllInterfacesForClass introspects parent- interfaces as well (SPR-7247)--	C	R	Class4
1587	Fixed setFavorPathExtension delegation code--	C	R	Class4
1588	Allow configuring custom ThreadPoolTaskExecutor--Issue: SPR-12272-	A	R	Class4
1589	Clean up spring-webmvc-portlet tests warnings--Clean up compiler warnings in the tests of spring-webmvc-portlet. This-commit adds type parameters to all the types (mostly `List` and `Map`).--After this commit the only warnings in spring-web left are the-subclasses of `MyCommandProvidingFormController`.-	P	A	Class4
1590	Refactor from deprecated GenericTypeResolver- calls--Refactor AbstractMessageConverterMethodArgumentResolver and-BridgeMethodResolver to use ResolvableType in preference to deprecated-GenericTypeResolver calls.	P	R	Class4
1591	Inlined AntPathStringMatcher into AntPathMatcher--Also initializing the capacity of the AntPathStringMatcher cache to 256 now.-	P	R	Class4
1592	+ add implicit (String) type for typed string- values w/o a specified type--	A	R	Class4
1593	Revised- PersistenceExceptionTranslationInterceptor to lazily retrieve- PersistenceExceptionTranslator beans on demand--Issue: SPR-10894-	A	R	Class4
1594	JndiObjectFactoryBean explicitly only chooses- public interfaces as default proxy interfaces	C	A	Class3
1595	SPR-8883 - RestTemplate.headForHeaders throws- "IllegalArgumentException: No InputStream specified" on server resource which- status code are 4xx--	C	R	Class4
1596	included qualifier value in debug log for each- transaction	P	A	Class2
1597	Polish (minor)--	P	A	Class3
1598	Allow setting WSDL document as a Resource--Prior to this change, LocalJaxWsServiceFactory allowed specifying a WSDL-document URL. Now users may also specify a WSDL document represented as-a Spring Resource object for convenience.	A	A	Class3
1599	Provide alternative message code resolver styles--Introduce new 'style' property to DefaultMessageCodesResolver allowing-for alternative message styles. Current styles are PREFIX_ERROR_CODE-and POSTFIX_ERROR_CODE. The default style retains existing behavior.	A	A	Class3
1600	Guard against null in -visitInnerClass--Issue: SPR-8358,SPR-8186-	C	R	Class4
1601	Prepared for JDK 1.9--Aiming for the JdkVersion class to support one generation ahead now, in order for the test suite to properly detect 1.7/1.8+ JVMs even when running against a JDK 1.9 preview at some point.-	P	R	Class4
1602	Polish MockHttpServletRequestBuilder--	P	R	Class4
1603	added test with custom repository annotation--	P	A	Class3
1604	more work on enabling non-namespace extensions of- xml parsing--	A	A	Class3
1605	Make DelegatingWebMvcConfiguration- config callbacks not final--It should be possible to progress from extending-WebMvcConfigurerAdapter (w/ @EnableWebMvc) to extending-WebMvcConfigurationSupport directly, to extending-DelegatingWebMvcConfigurationSupport. This change-makes that possible.-	P	R	Class4
1606	ContentNegotiatingViewResolver can not- handle View implementations returning null as content type--	C	R	Class4
1607	Add context hierarchy tests to Spring MVC Test	A	A	Class1
1608	SPR-5973: Extract UriComponentTemplate out of- UriTemplate--	P	R	Class4
1609	Fix conversion of Message<?> payload for replies--If a custom MessageConverter is set, it is not used for replies defined-via the Message abstraction. This commit harmonizes the behaviour of the-`MessagingMessageConverter` so that the conversion of the payload can-be converted for both incoming and outgoing messages.	C	A	Class3
1610	fixed scheduling tests--	C	A	Class3
1611	Consistent support for JTA 1.1- TransactionSynchronizationRegistry--JtaTransactionManager's configuration options for a TransactionSynchronizationRegistry are now in sync with the options for UserTransaction/TransactionManager. Specifically, there are setTransactionSynchronizationRegistry/getTransactionSynchronizationRegistry methods for programmatic configuration now. Motivated by Spring's adapt…	C	R	Class4
1612	Provide controller level Cache-Control support--Prior to this commit, Cache-Control HTTP headers could be set using-a WebContentInterceptor and configured cache mappings.--This commit adds support for cache-related HTTP headers at the controller-method level, by returning a ResponseEntity instance:--ResponseEntity.status(HttpStatus.OK)- .cacheControl(CacheControl.maxAge(1, TimeUnit.HOURS).cachePu…	P	A	Class1
1613	Consistent use of varargs, consistent template- method order--	P	R	Class4
1614	Polishing (including removal of javadoc imports- that show as package cycles in IntelliJ)--	P	A	Class3
1615	AnnotatedElementUtils wraps unexpected exceptions- with descriptive IllegalStateException	C	R	Class4
1616	Fix race when flushing messages--The use of an AtomicBoolean and no lock meant that it was possible-for a message to be queued and then never be flushed and sent to the-broker:--1. On t1, a message is received and isConnected is false. The message- will be queued.-2. On t2, CONNECTED is received from the broker. isConnected is set- to true, the queue is drained and the queued messages are forward…	C	R	Class4
1617	HandlerExecutionChain prevents re-adding the- interceptors array to the list (and declares varargs now)	C	A	Class3
1618	JavaDoc on- AnnotationConfigApplicationContext-scan(String...)--	P	R	Class4
1619	@RequestMapping matching should be- insensitive to trailing slashes--	C	A	Class4
1620	Fix minor issue in MockHttpServletRequest--Previously MockHttpServletRequest-sendRedirect did not set the HTTP status-or the Location header. This does not conform to the HttpServletRequest-interface.--MockHttpServletRequest will now:-- - Set the HTTP status to 302 on sendRedirect- - Set the Location header on sendRedirect- - Ensure the Location header and getRedirectedUrl are kept in synch	C	A	Class3
1621	DataSourceUtils lets timeout exceptions through- even for setReadOnly calls (revised; SPR-7226)--	C	R	Class4
1622	removed unused method; polishing--	P	A	Class4
1623	Clean up spring-expression tests warnings--Clean up compiler warnings in the tests of spring-expression. This-commit adds type parameters to some of the types (mostly `List` and-`Map`). Some of them can't be cleaned up, some tests are even-specifically for raw types.-	P	A	Class4
1624	ServletRequestAttributes skips well-known- immutable values when updating accessed session attributes	P	R	Class4
1625	Fix package cycles in spring-test--Code introduced in conjunction with SPR-5243 introduced package cycles-between the ~.test.context and ~.test.context.web packages. This was-caused by the fact that ContextLoaderUtils worked directly with the-@WebAppConfiguration and WebMergedContextConfiguration types.--To address this, the following methods have been introduced in-ContextLoaderUtils. These meth…	C	R	Class4
1626	Changed use of AssertThrows to @Test(expected =- ...)--	P	R	Class4
1627	fixed bug related to array autogrow--	C	A	Class2
1628	fixed detection of element type in case of nested- collections	C	A	Class3
1629	bean properties of type enum array/collection can- be populated with comma-separated String	C	A	Class4
1630	fixed "hibernateManagedSession" mode to actually- work against Hibernate 4.0 (SPR-8776)--	C	R	Class4
1631	revised WebApplicationContext lookup--	P	R	Class4
1632	renamed 'isJava6VisibilityBridgeMethodPair' to- 'isVisibilityBridgeMethodPair'	P	A	Class4
1633	RestTemplate/UriTemplate/UriUtils- improperly encoding UTF-8--	C	R	Class4
1634	Workaround Javadoc bug with JDK 8 (b112+)--Remove Javadoc linkplain to ExceptionHandler-value() from-AnnotationMethodHandlerExceptionResolver to work around JDK-Javadoc bug 9007707.-	C	R	Class4
1635	Polishing--	P	R	Class3
1636	Resolve nested placeholders via PropertyResolver--Prior to this change, PropertySourcesPropertyResolver (and therefore-all AbstractEnvironment) implementations failed to resolve nested-placeholders as in the following example:-- p1=v1- p2=v2- p3=${v1}:{$v2}--Calls to PropertySource-getProperty for keys 'p1' and 'v1' would-successfully return their respective values, but for 'p3' the return-value …	C	R	Class4
1637	SPR-5251: URI Templates for @InitBinder--	A	R	Class4
1638	tests for custom conversion service / validator--	P	A	Class3
1639	polishing--	P	R	Class3
1640	Introduced- supports(MergedContextConfiguration) method in the SmartContextLoader SPI;- updated existing loaders accordingly; and fleshed out implementation of and- tests for the new DelegatingSmartContextLoader.--	A	A	Class1
1641	Fix nested @Component annotation instantiation- bug--3.1 M2 introduced a regression that causes false positives during-@Configuration class candidate checks. Now performing a call to-AnnotationMetadata-isInterface in addition to checks for @Component and-@Bean annotations when determining whether a candidate is a 'lite'-configuration class. Annotations are in the end interfaces, so both-are filte…	C	R	Class4
1642	Improve StringUtils.cleanPath	C	A	Class3
1643	SpringJUnit4ClassRunnerAppCtxTests now verifies- seamless support for using @Inject in addition to @Autowired, etc.--	A	R	Class4
1644	Improve documentation of SpringFactoriesLoader--	P	A	Class3
1645	Servlet/PortletRequestDataBinder perform- unwrapping for MultipartRequest as well	C	R	Class4
1646	A default HandlerExceptionResolver- that resolves standard Spring exceptions--	P	R	Class4
1647	Fix Jackson @JSONView when using XML- serialization--Issue: SPR-12149-	C	R	Class4
1648	Add putIfAbsent on Cache abstraction--This commit adds a putIfAbsent method to the Cache interface. This-method offers an atomic put if the key is not already associated in-the cache.--Issue:	A	A	Class2
1649	Add Jackson2ObjectMapperBeanFactory--Issue: SPR-9739-	A	R	Class4
1650	revised version checks and exception signatures--	P	A	Class4
1651	added DataSourceFactory strategy; promoted- EmbeddedDatabaseConfigurer strategy to public API; added ability to add any- number of SQL scripts for db population--	A	A	Class3
1652	Hibernate synchronization properly unbinds- Session even in case of afterCompletion exception	C	R	Class4
1653	fixed JSR-303 Validator delegation code- (SPR-6557)--	C	R	Class4
1654	IdToEntityConverter defensively handles access to- getDeclaredMethods	C	R	Class4
1655	SQLStateSQLExceptionTranslator checks exception- class name for timeout indication before resorting to- UncategorizedSQLException	C	R	Class4
1656	Improve exception message	P	A	Class4
